# Supplementary material
Source: ML conference proceedings conference paper supplement (https://openreview.net/forum?id=XzaSGIStXP)
Supplement: supplementary_material [file attachment]

~~→~~ Black-box Accuracy (train)    ~~→~~ Black-box Accuracy (test)    ~~→~~ Best (test)
