# Supplementary material
Source: ML conference proceedings conference paper supplement (https://openreview.net/forum?id=XzaSGIStXP)

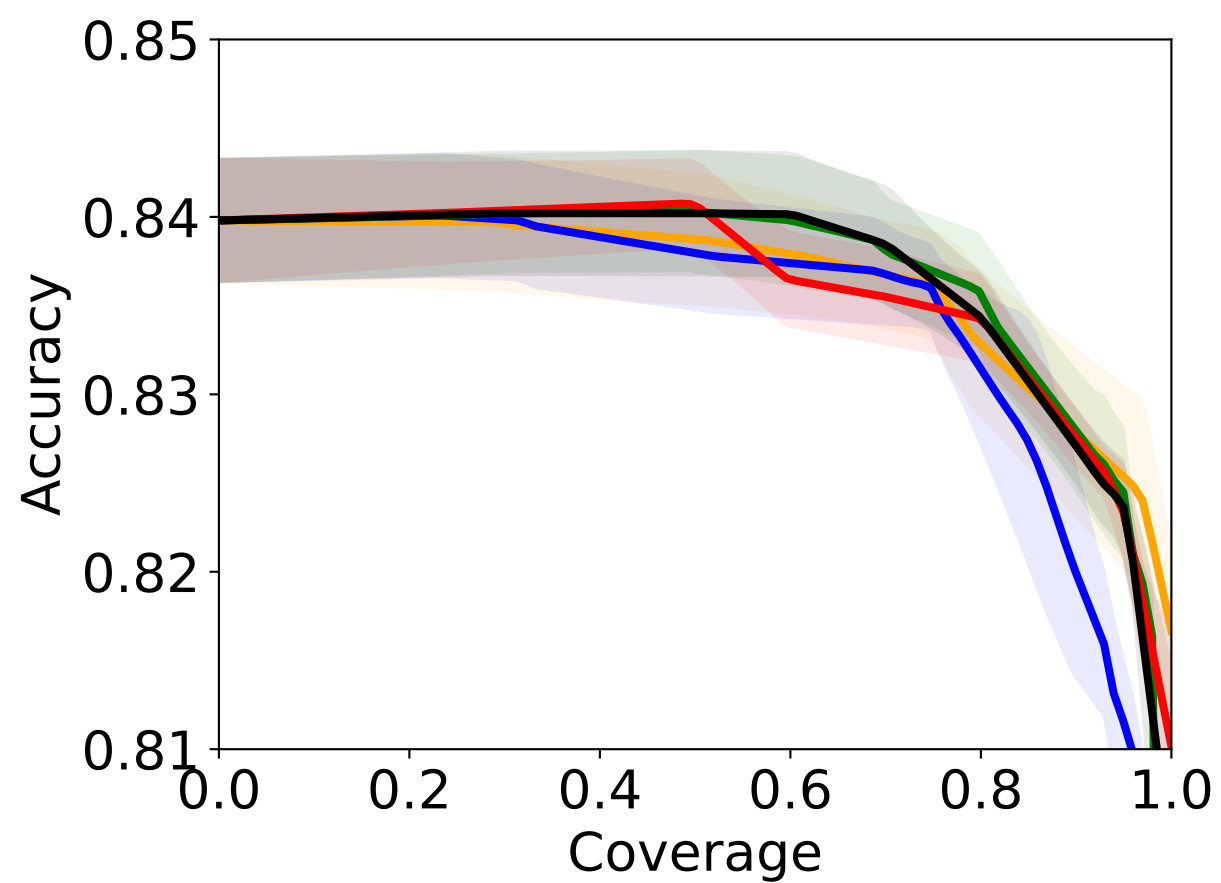

Supplement: supplementary_material [file attachment]

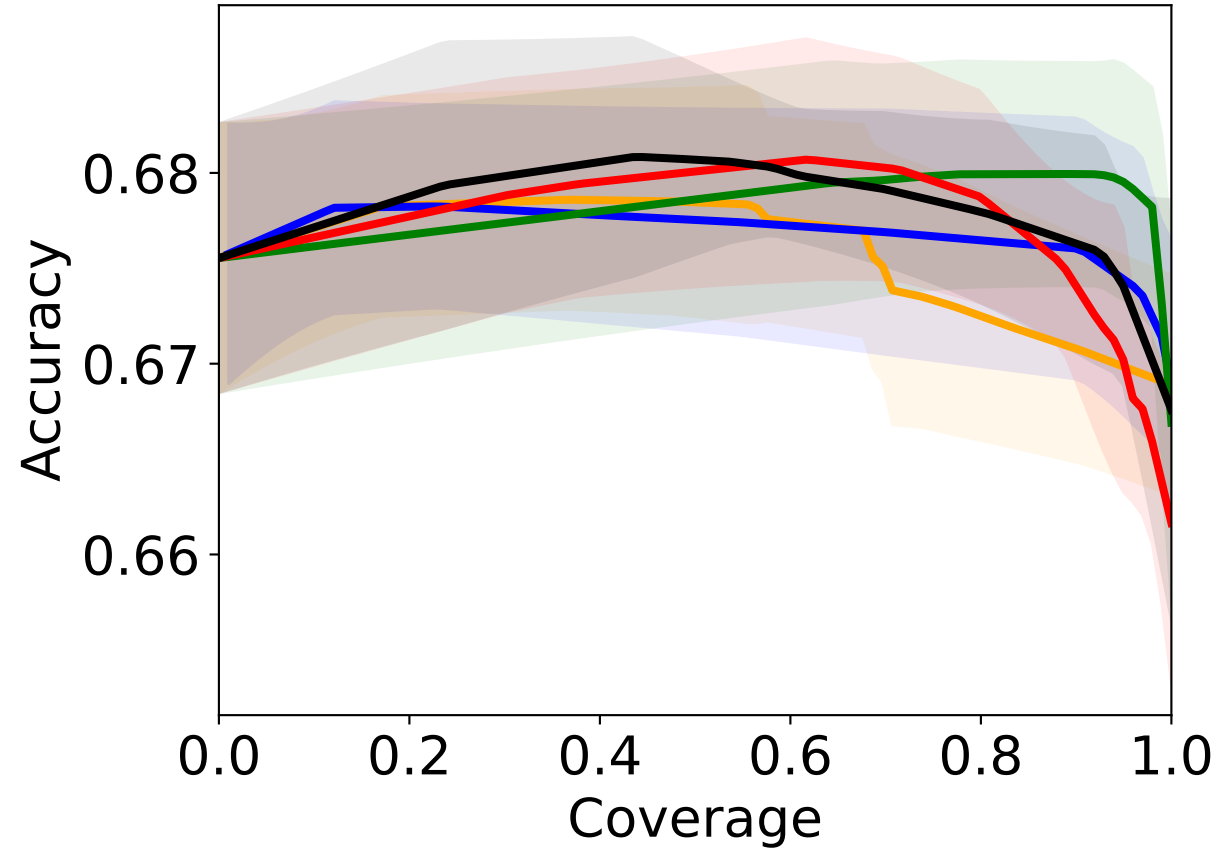

Supplement: supplementary_material [file attachment]

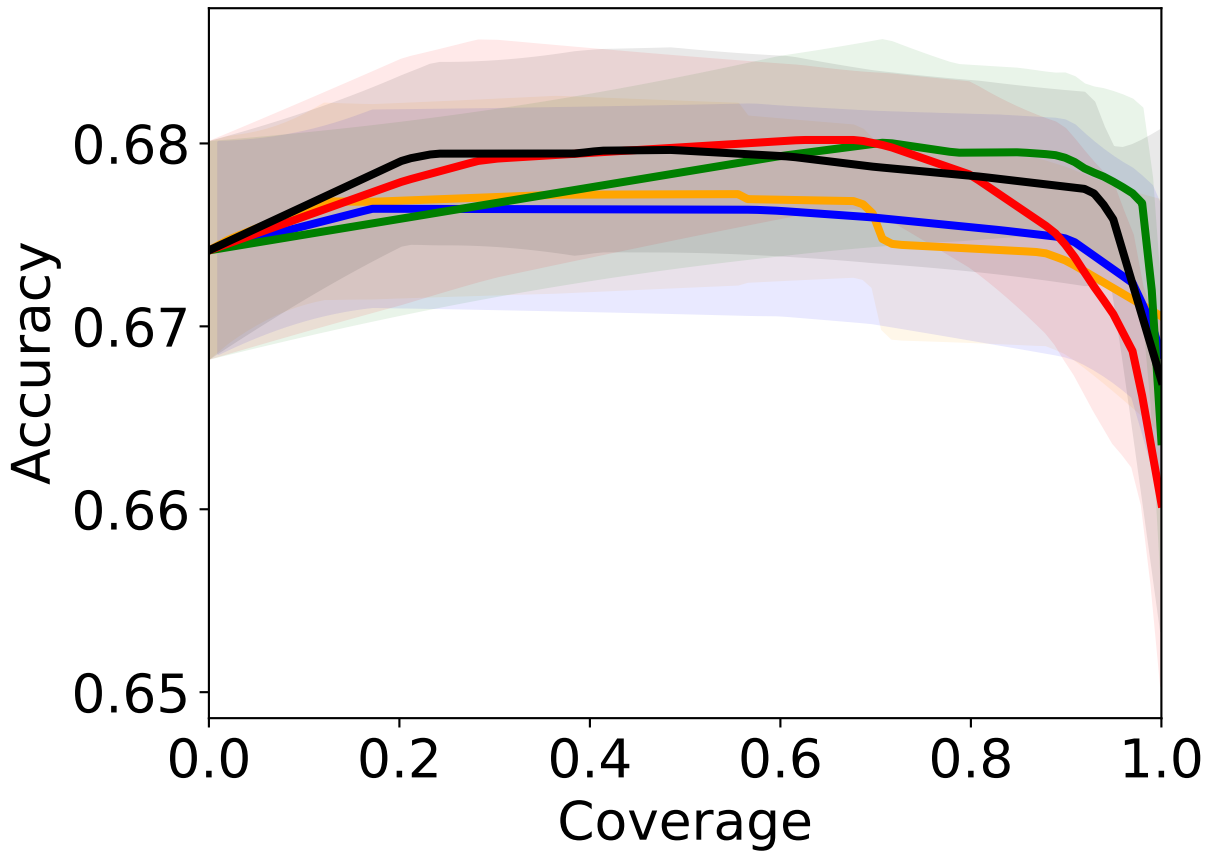

Supplement: supplementary_material [file attachment]

# High Transparency (0.85)

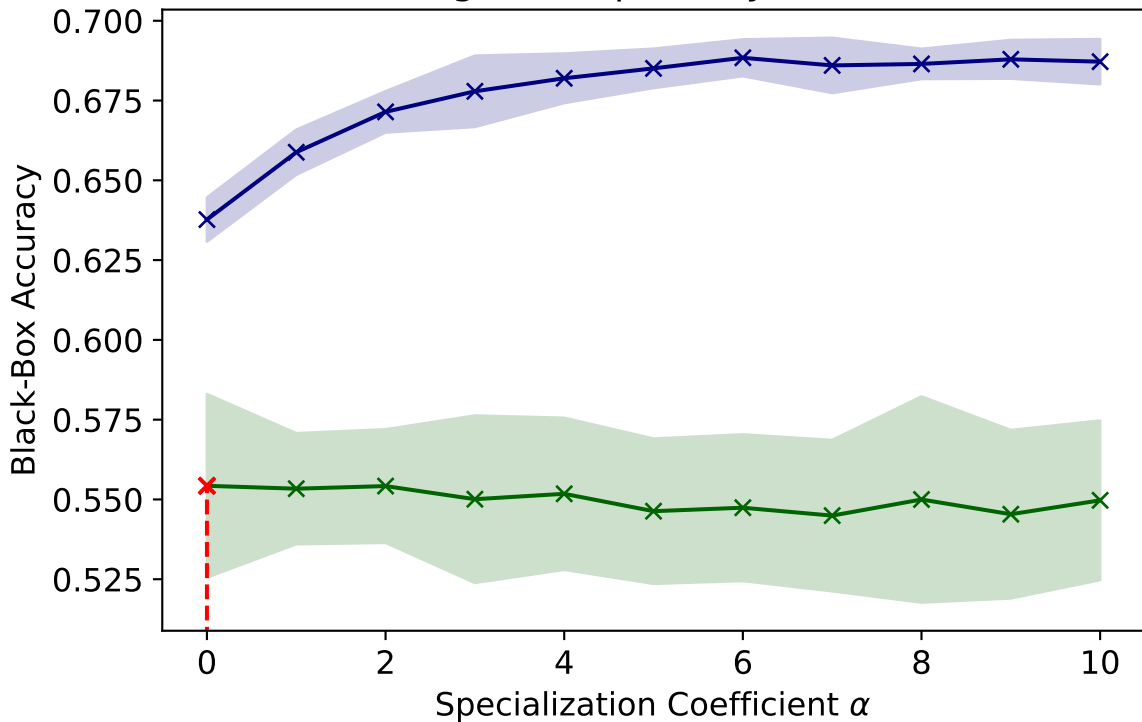

Supplement: supplementary_material [file attachment]

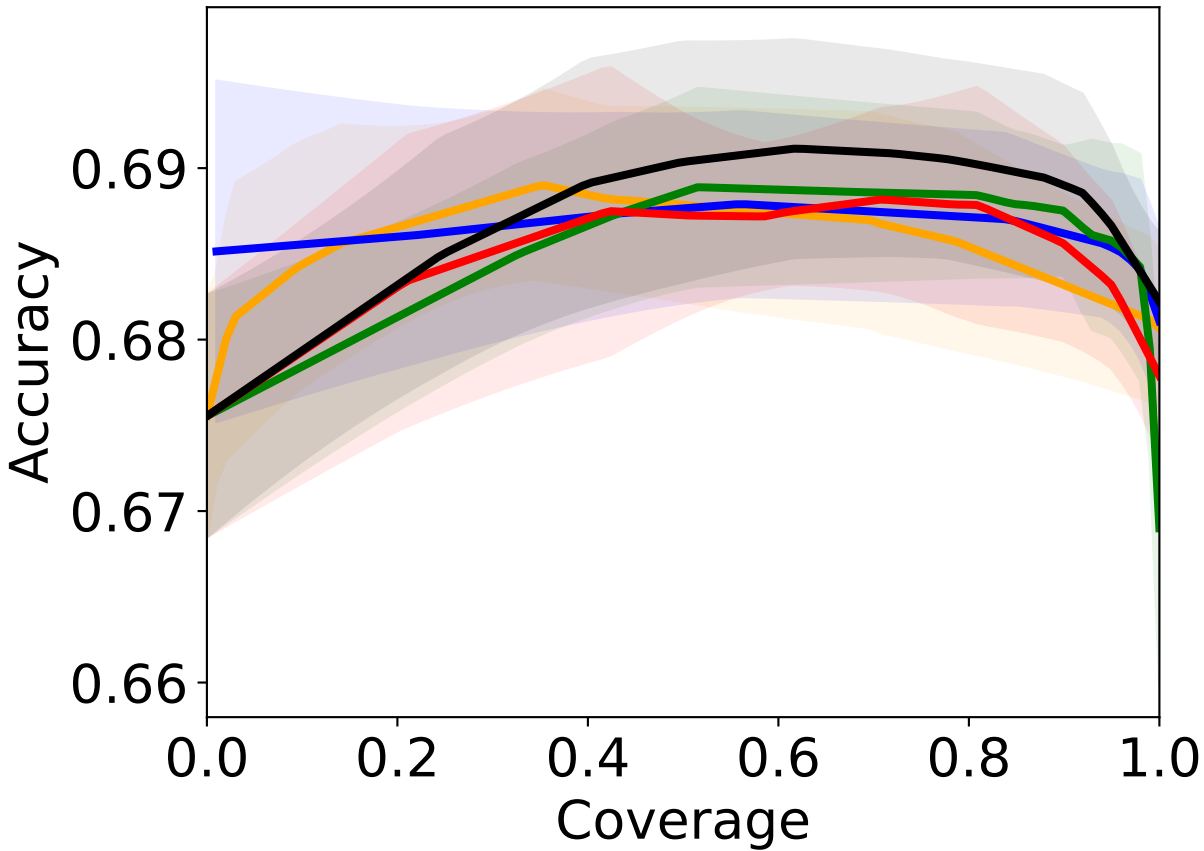

Supplement: supplementary_material [file attachment]

Very High Transparency (0.95)

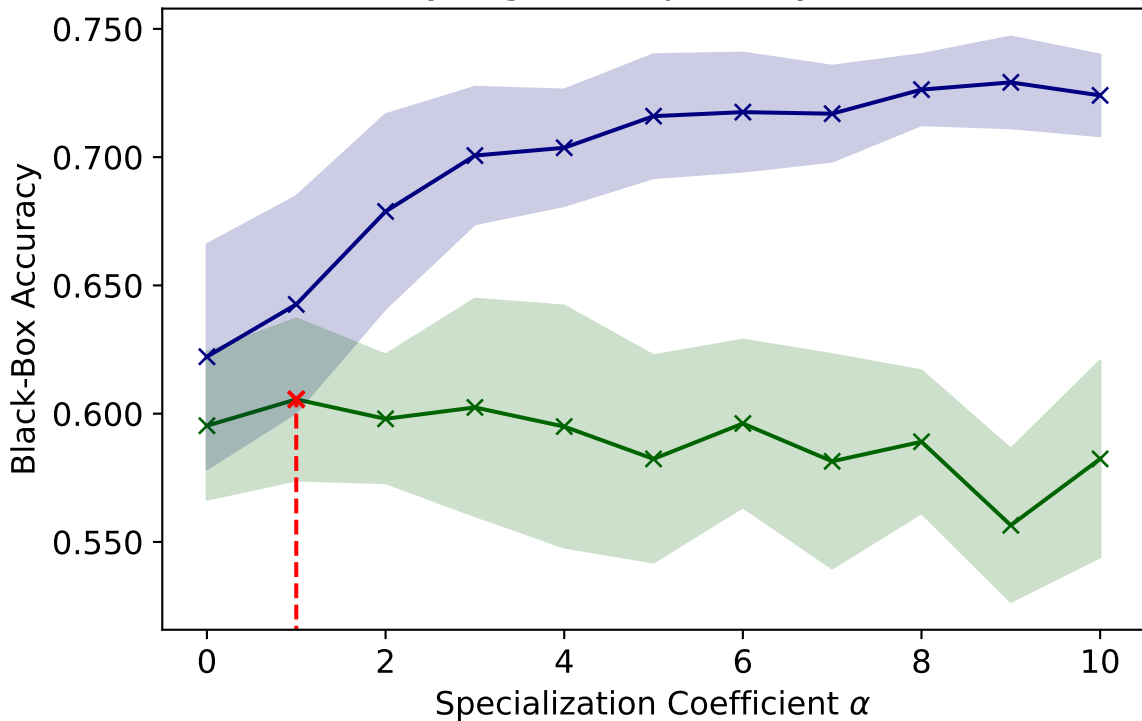

Supplement: supplementary_material [file attachment]

Overall Accuracy Upper Bound

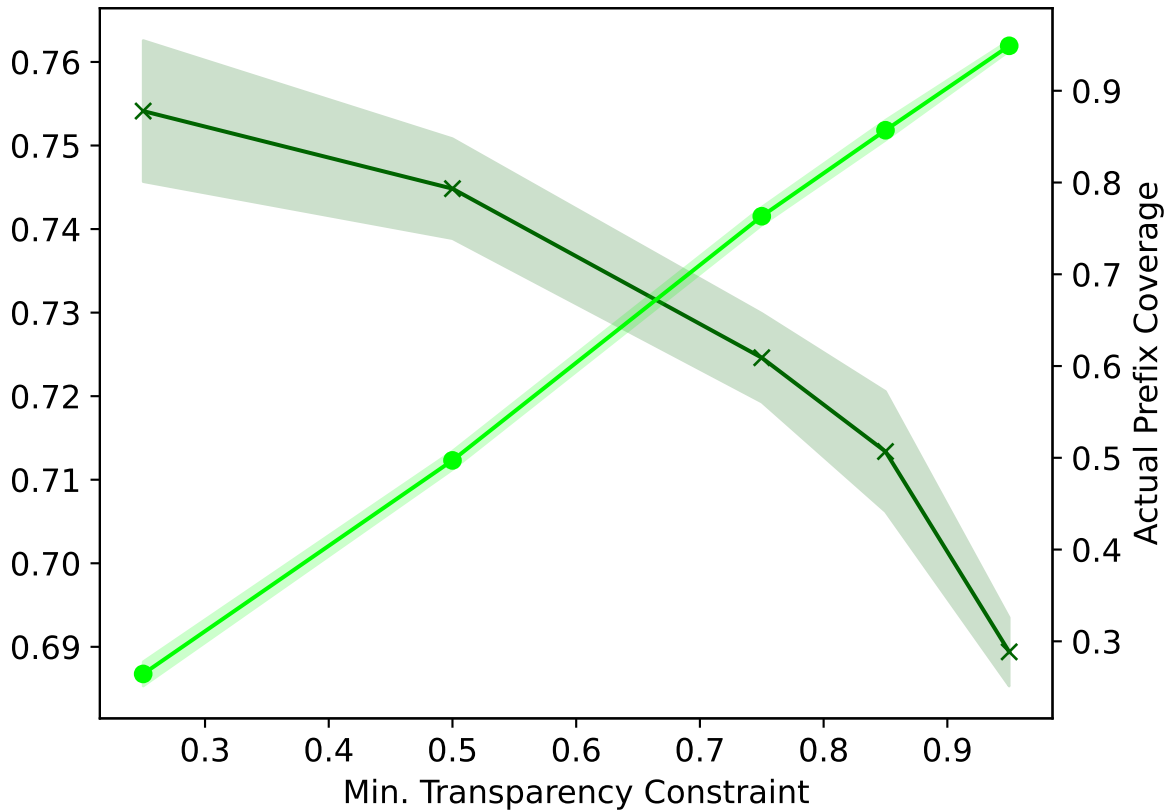

Supplement: supplementary_material [file attachment]

Overall Accuracy Upper Bound

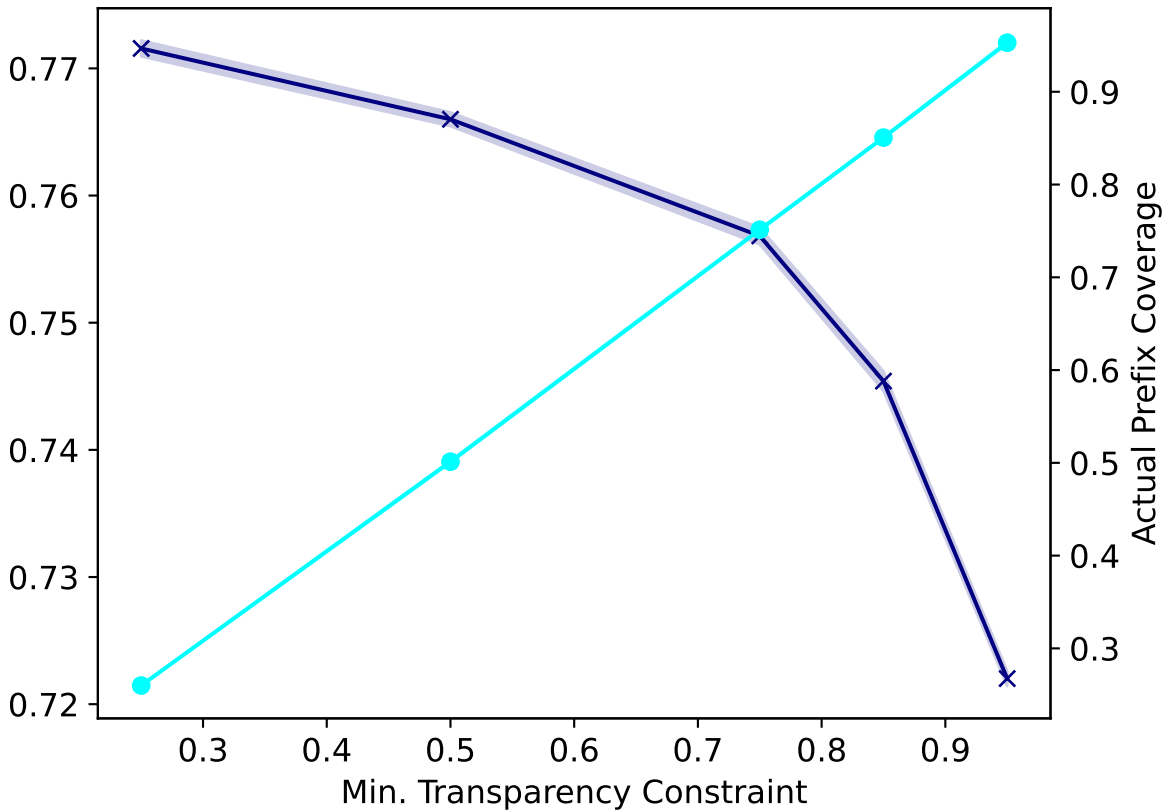

Supplement: supplementary_material [file attachment]

# High Transparency (0.75)

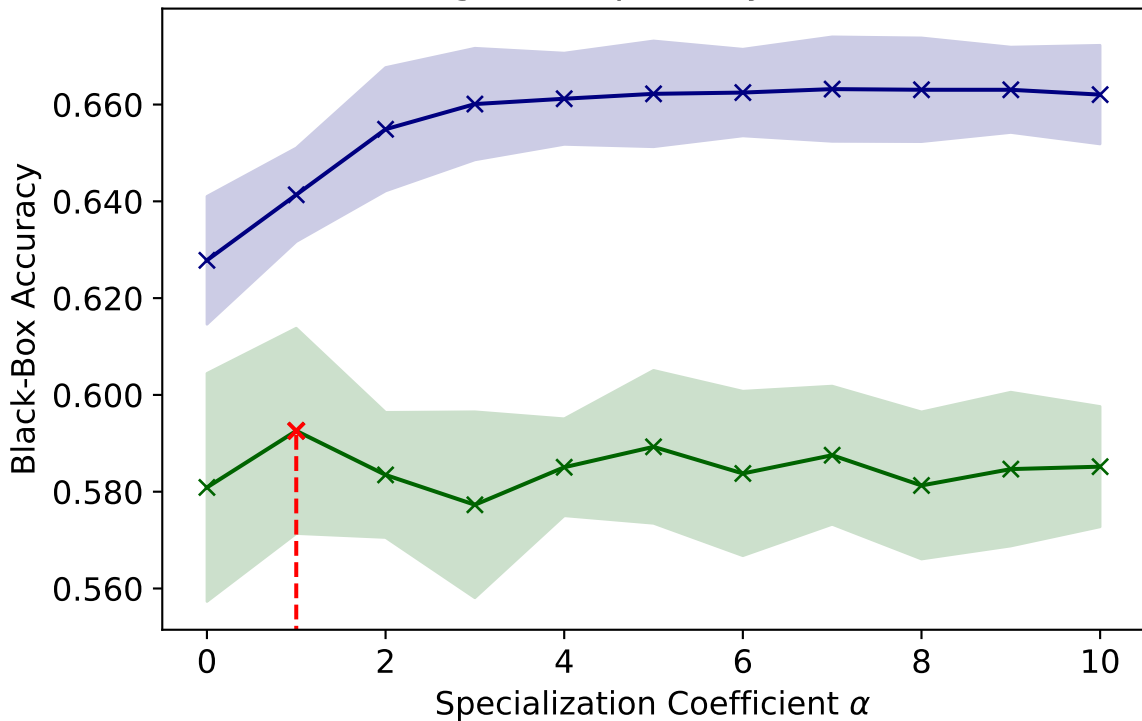

Supplement: supplementary_material [file attachment]

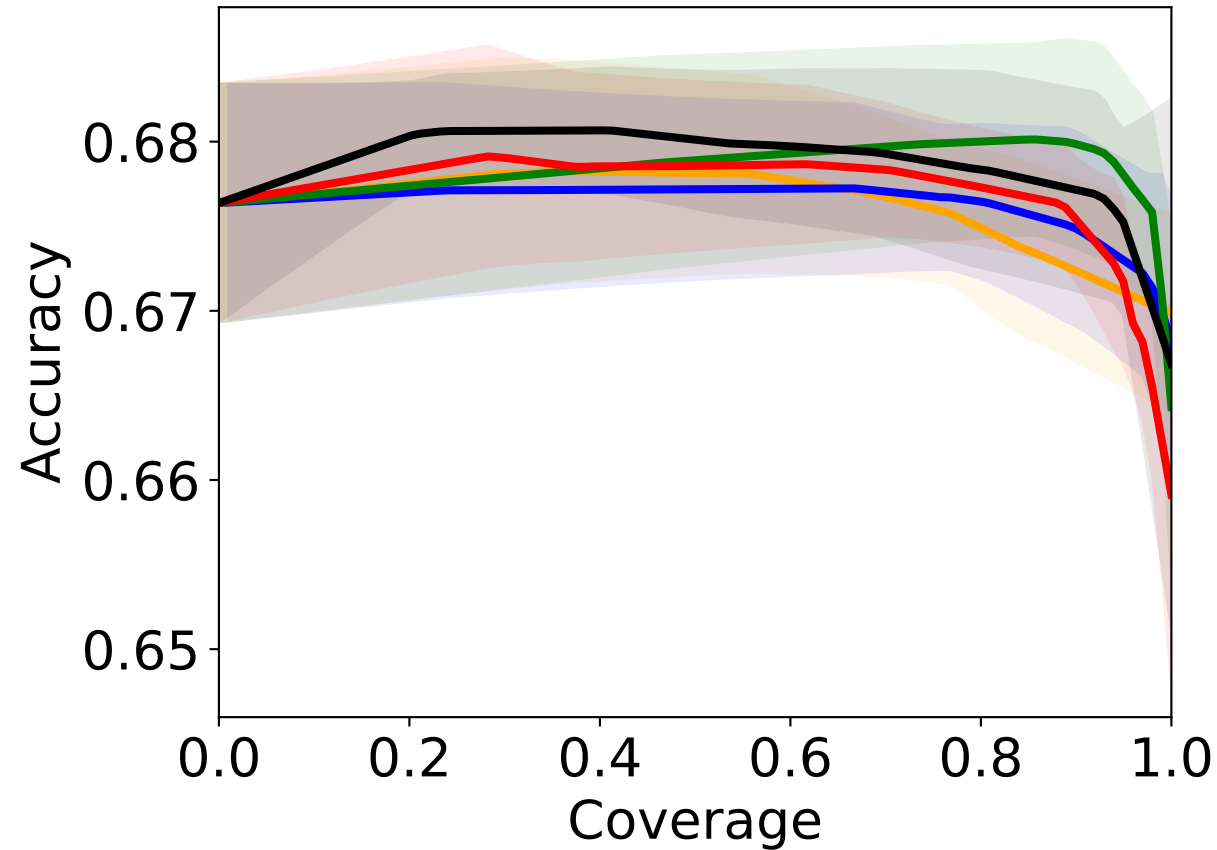

Supplement: supplementary_material [file attachment]

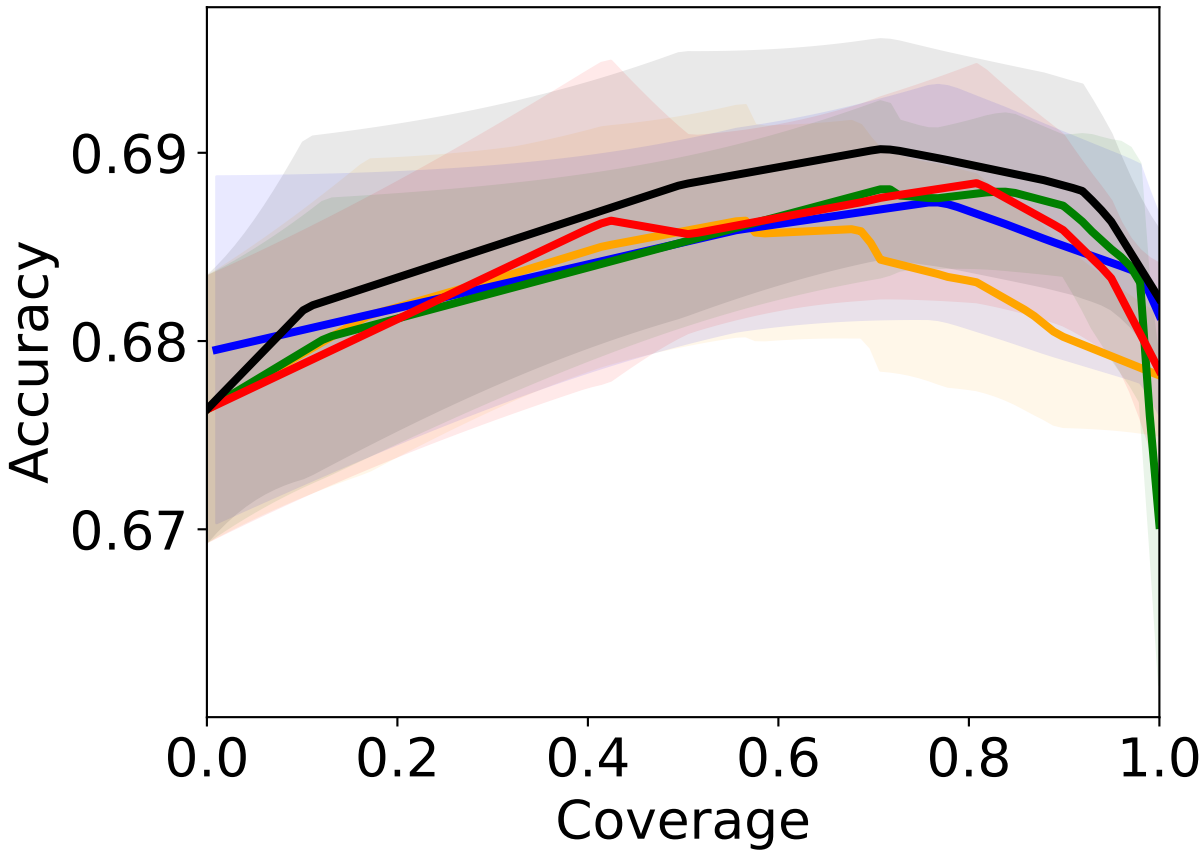

Supplement: supplementary_material [file attachment]

Low Transparency (0.25)

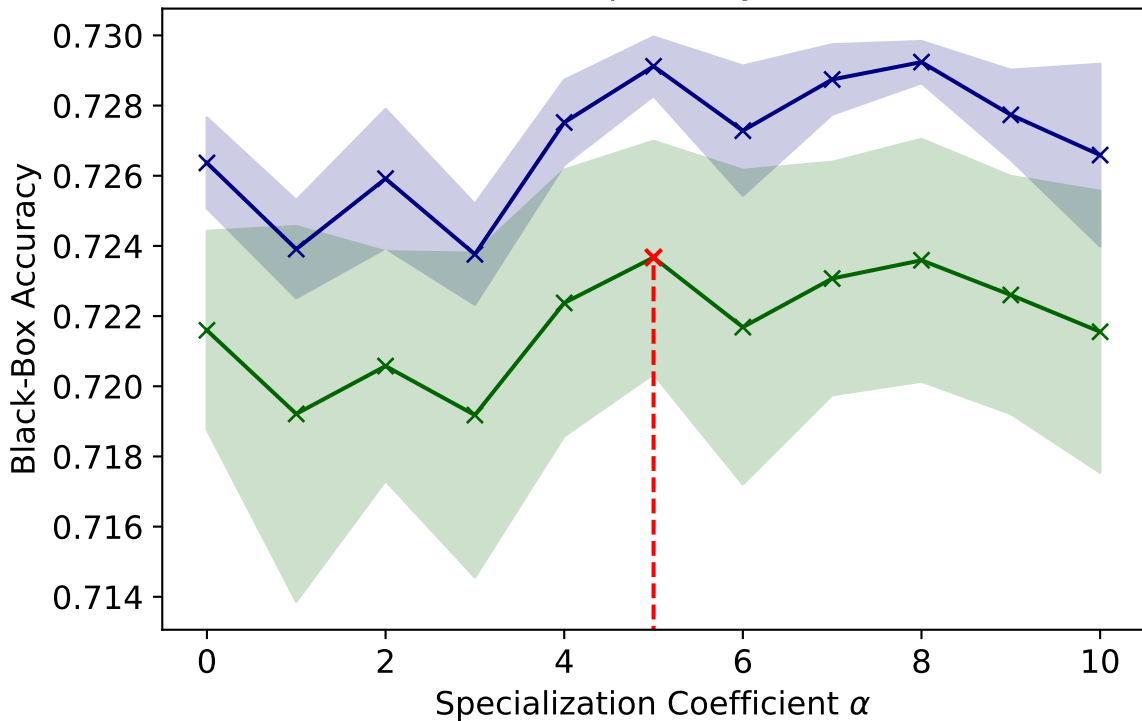

Supplement: supplementary_material [file attachment]

Medium Transparency (0.50)

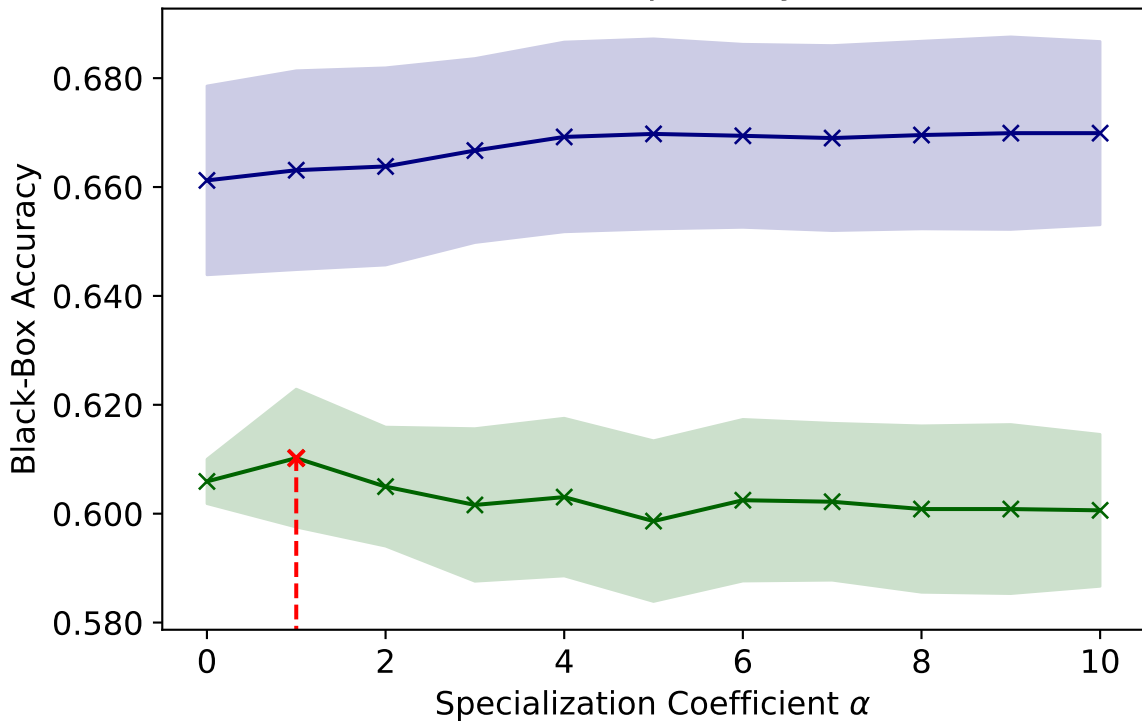

Supplement: supplementary_material [file attachment]

Medium Transparency (0.50)

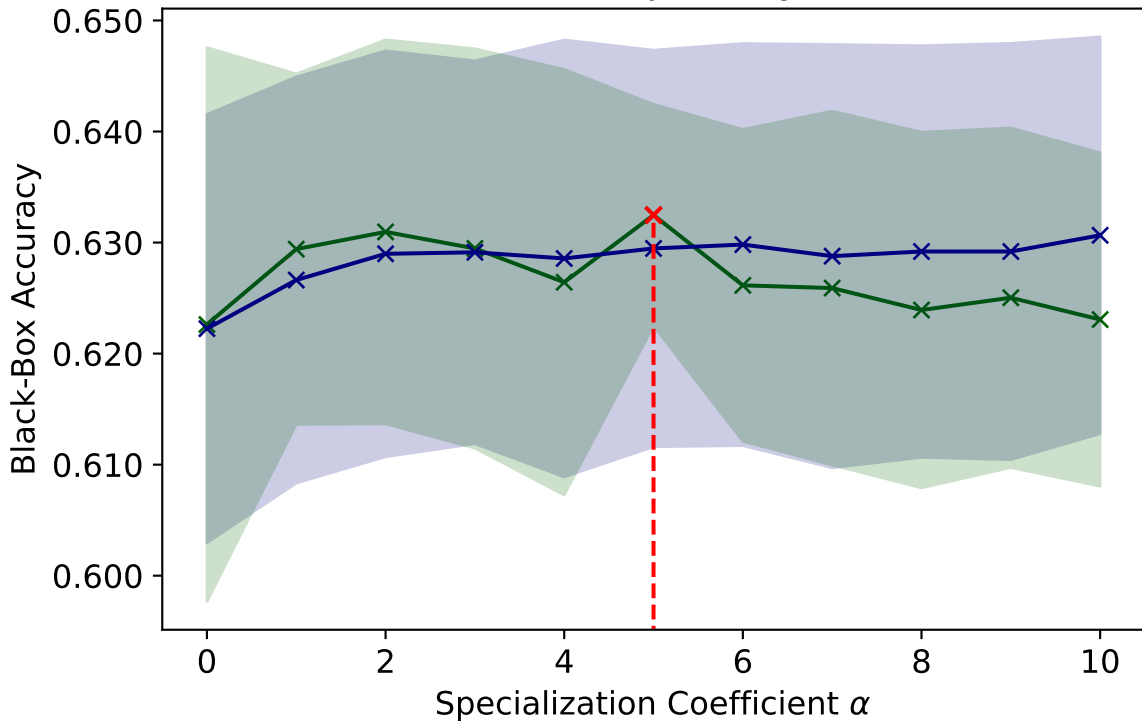

Supplement: supplementary_material [file attachment]

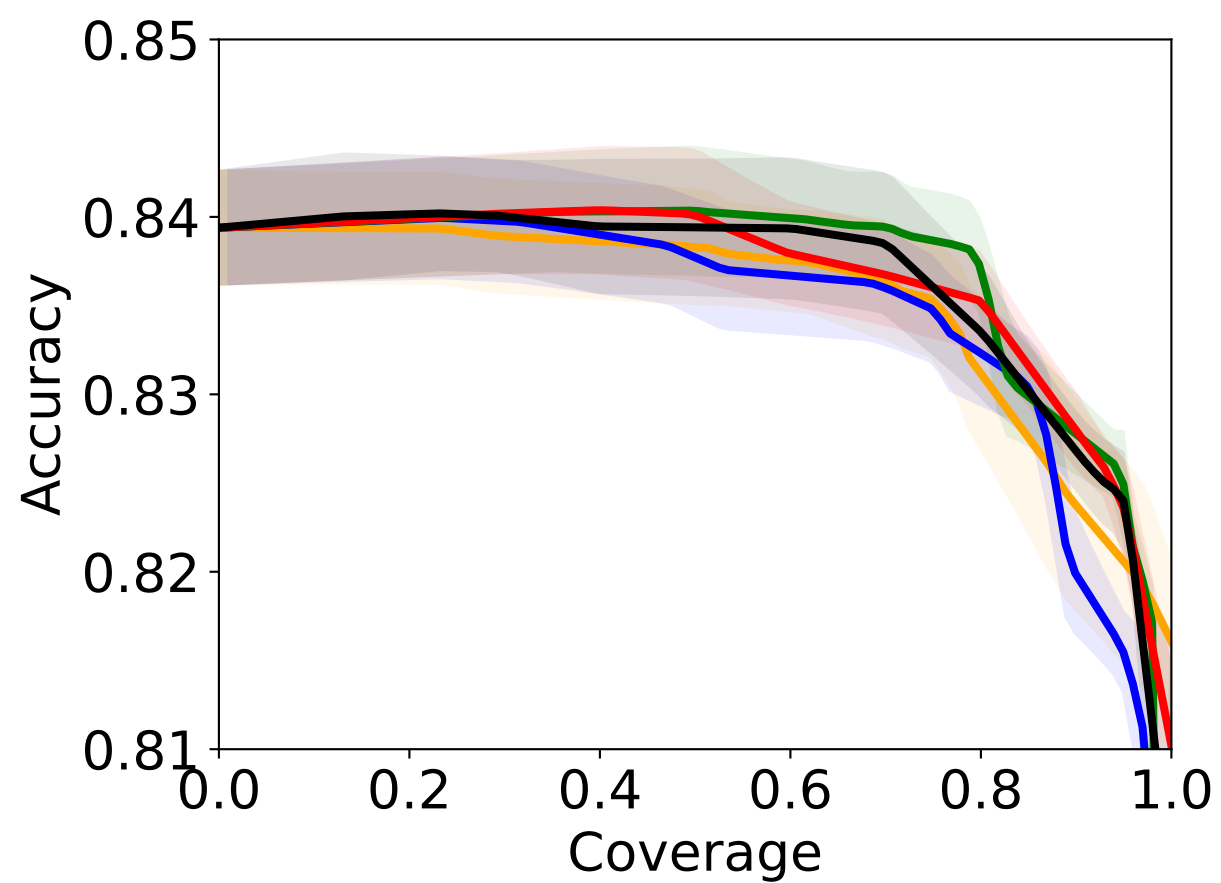

Supplement: supplementary_material [file attachment]

High Transparency (0.85)

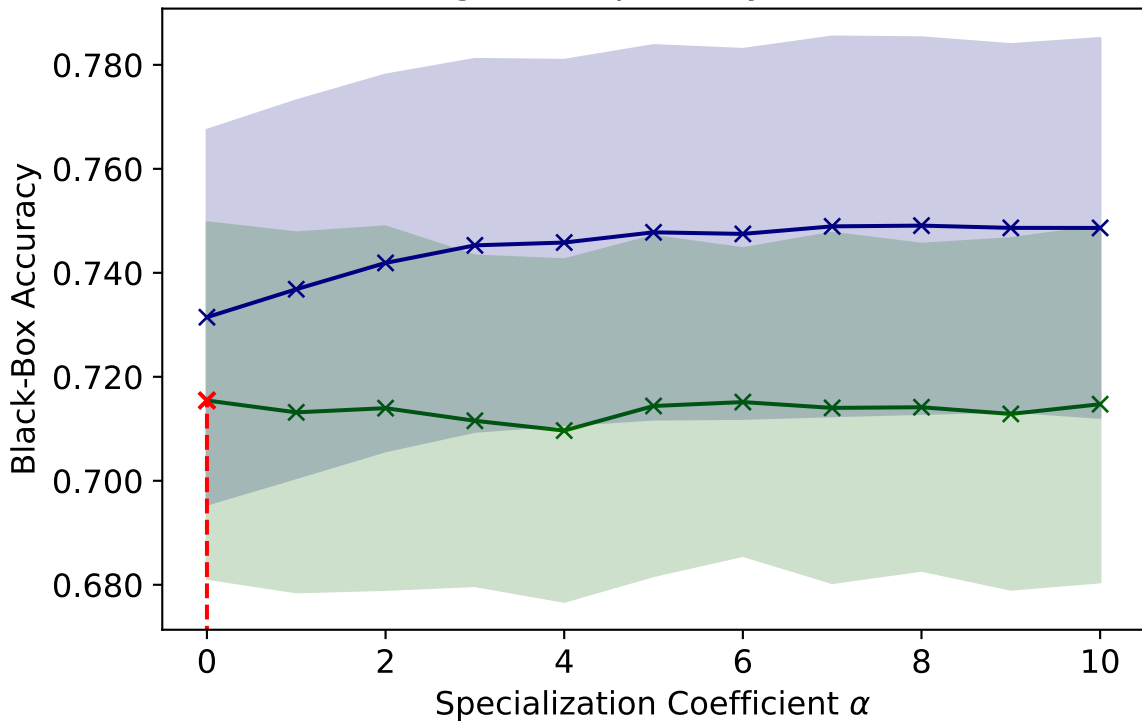

Supplement: supplementary_material [file attachment]

Low Transparency (0.25)

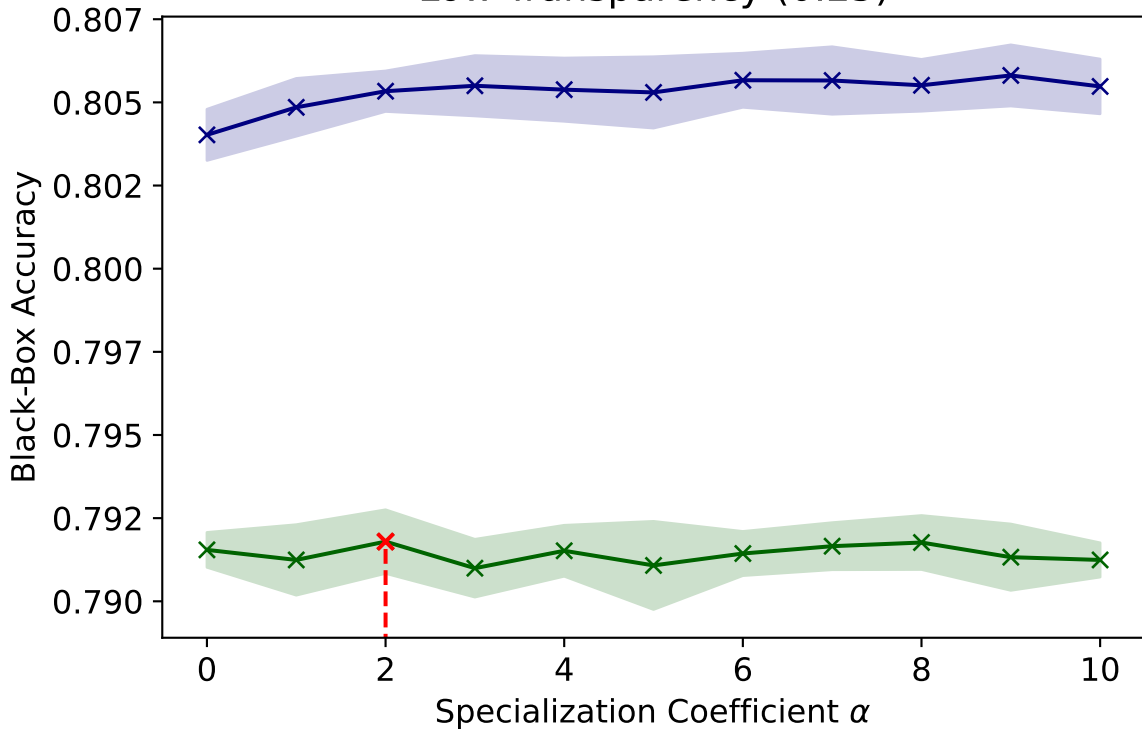

Supplement: supplementary_material [file attachment]

# High Transparency (0.85)

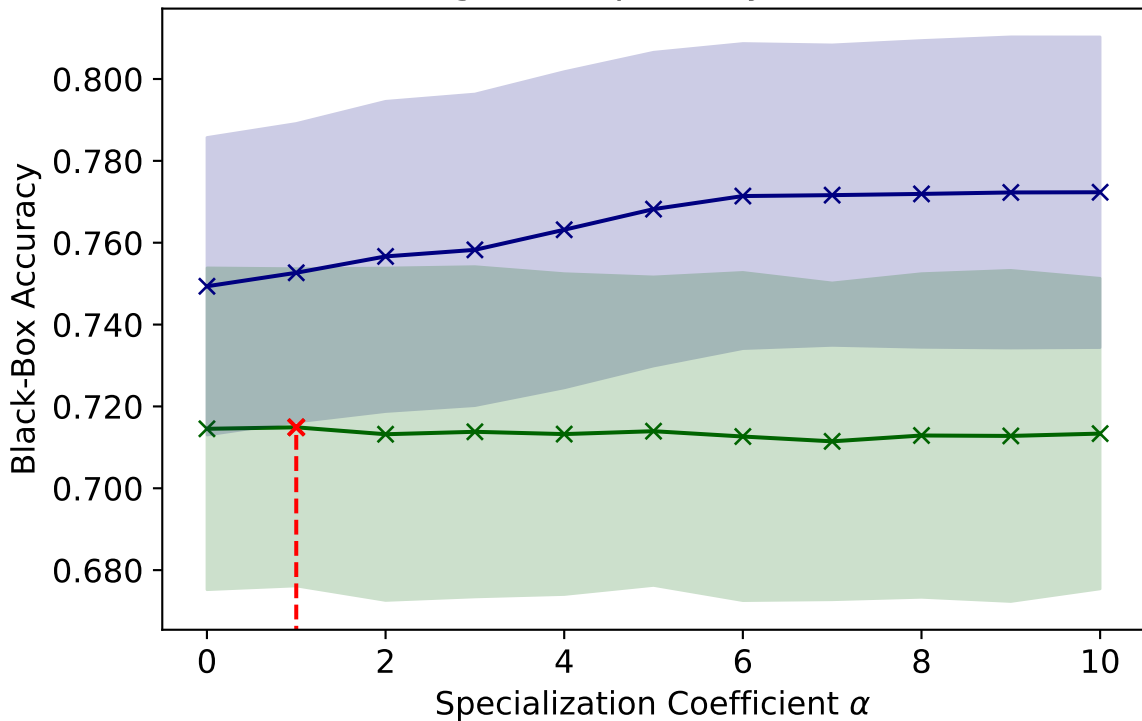

Supplement: supplementary_material [file attachment]

High Transparency (0.75)

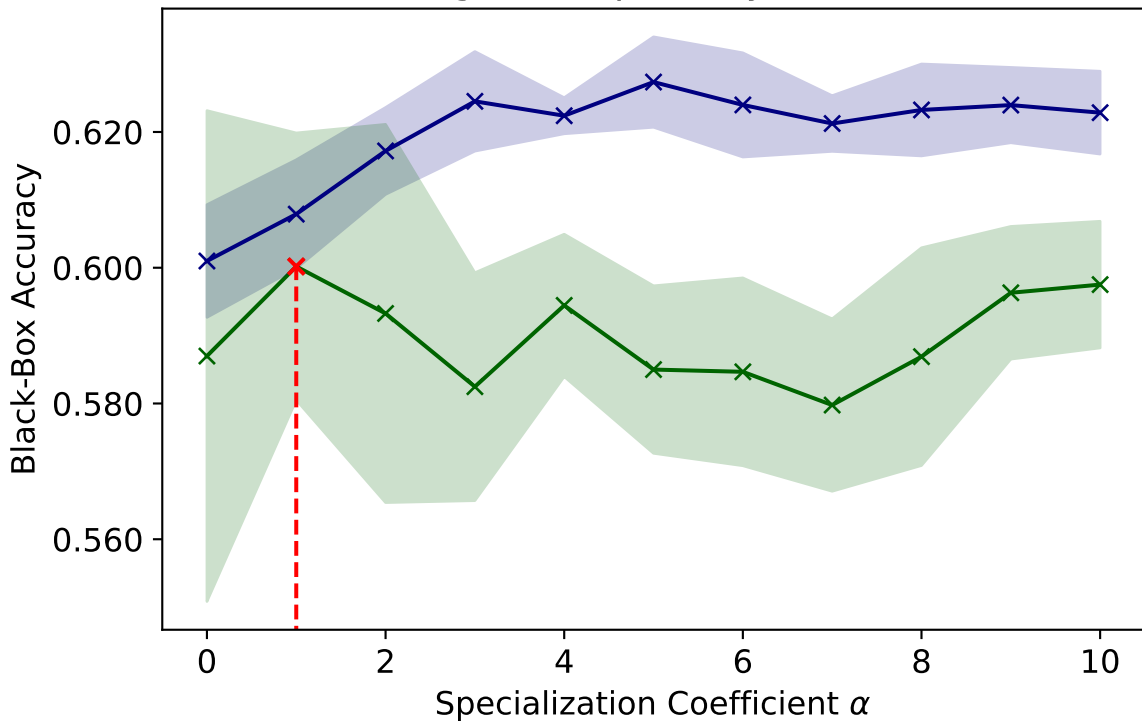

Supplement: supplementary_material [file attachment]

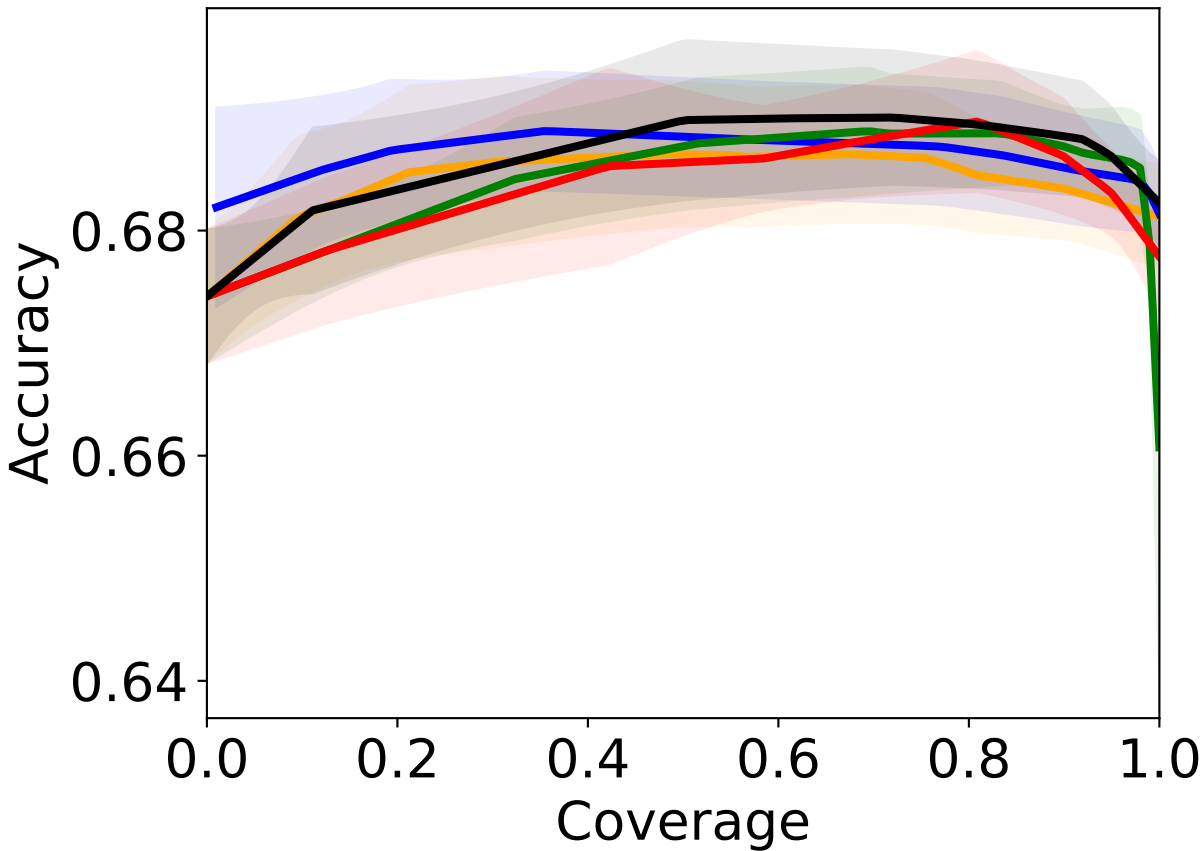

Supplement: supplementary_material [file attachment]

Very High Transparency (0.95)

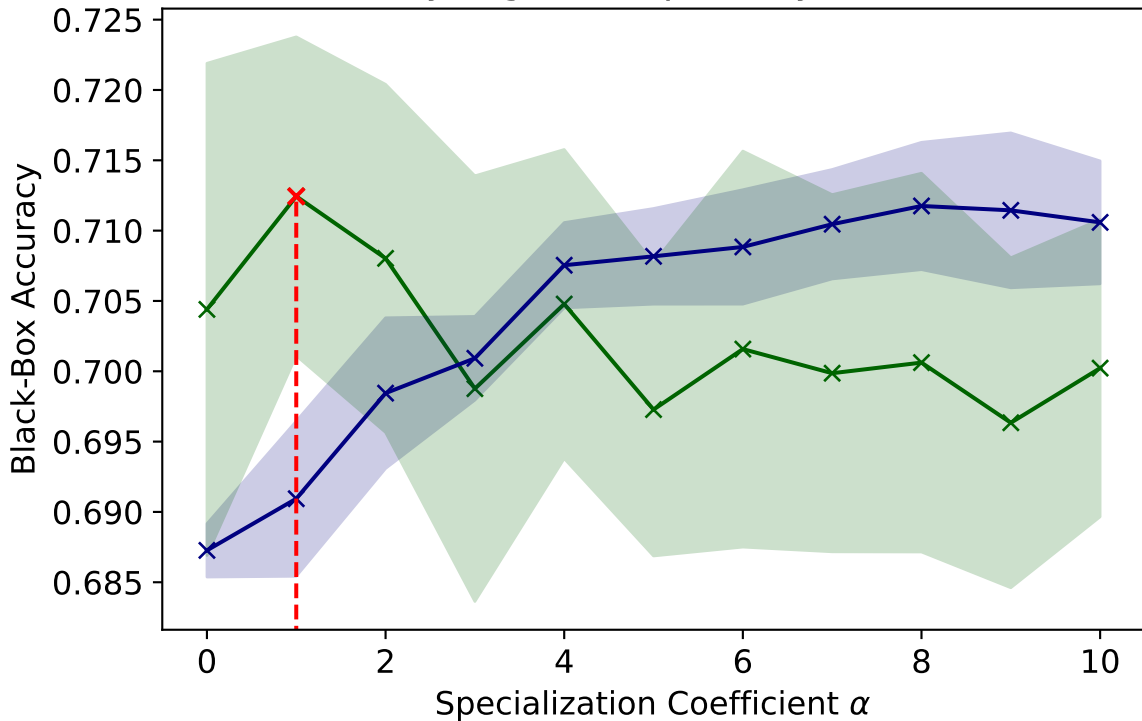

Supplement: supplementary_material [file attachment]

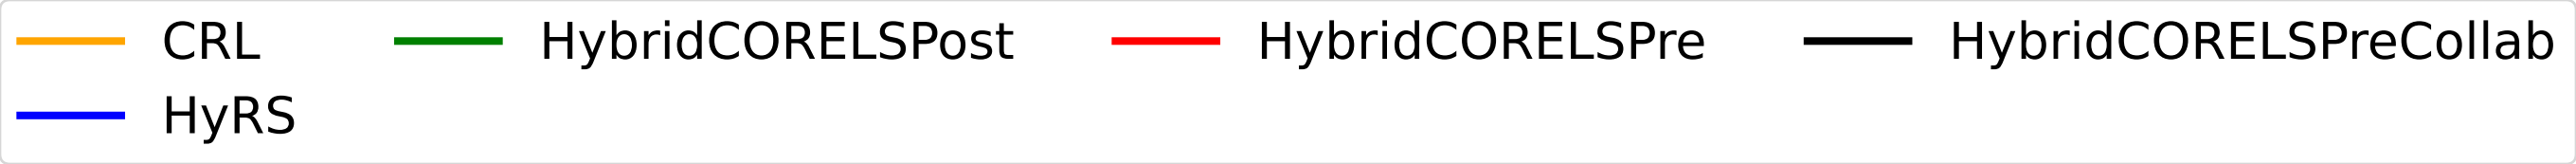

Supplement: supplementary_material [file attachment]

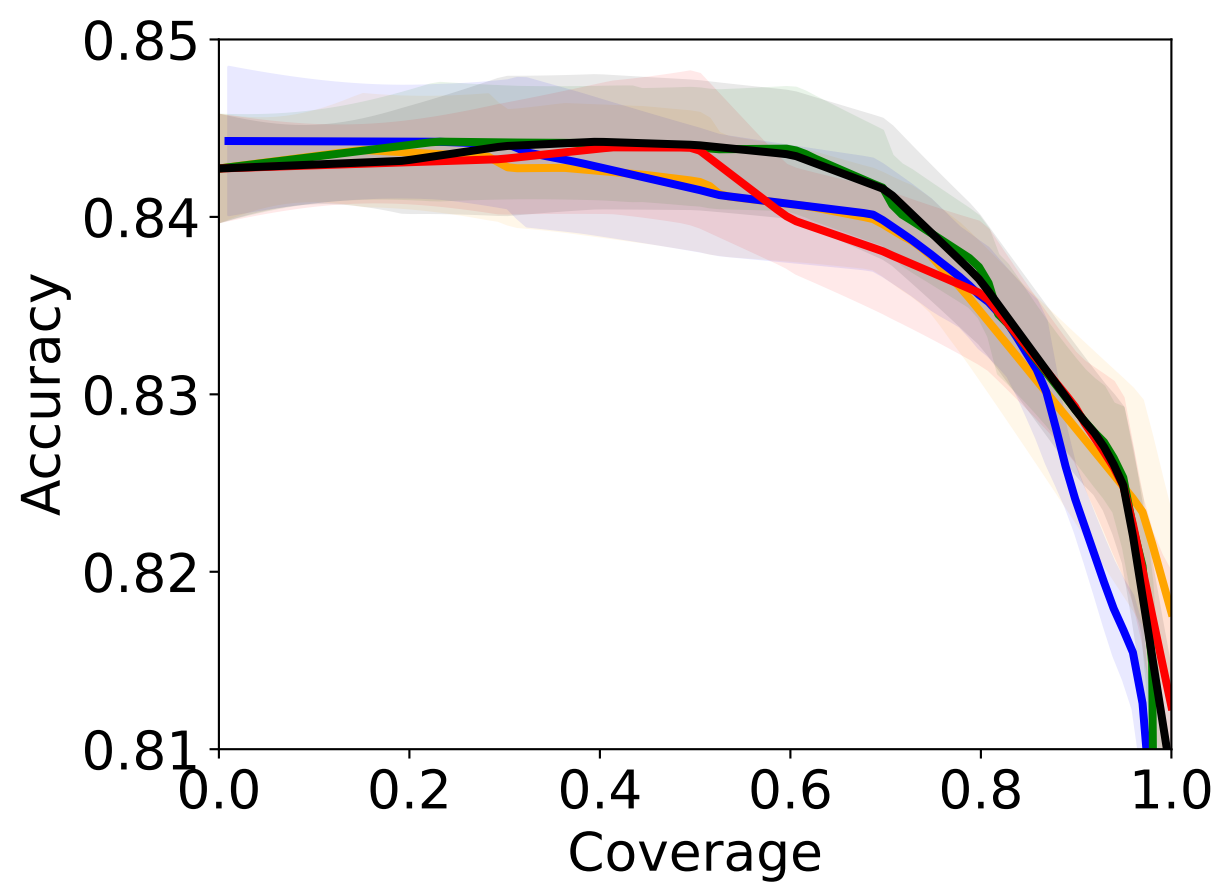

Supplement: supplementary_material [file attachment]

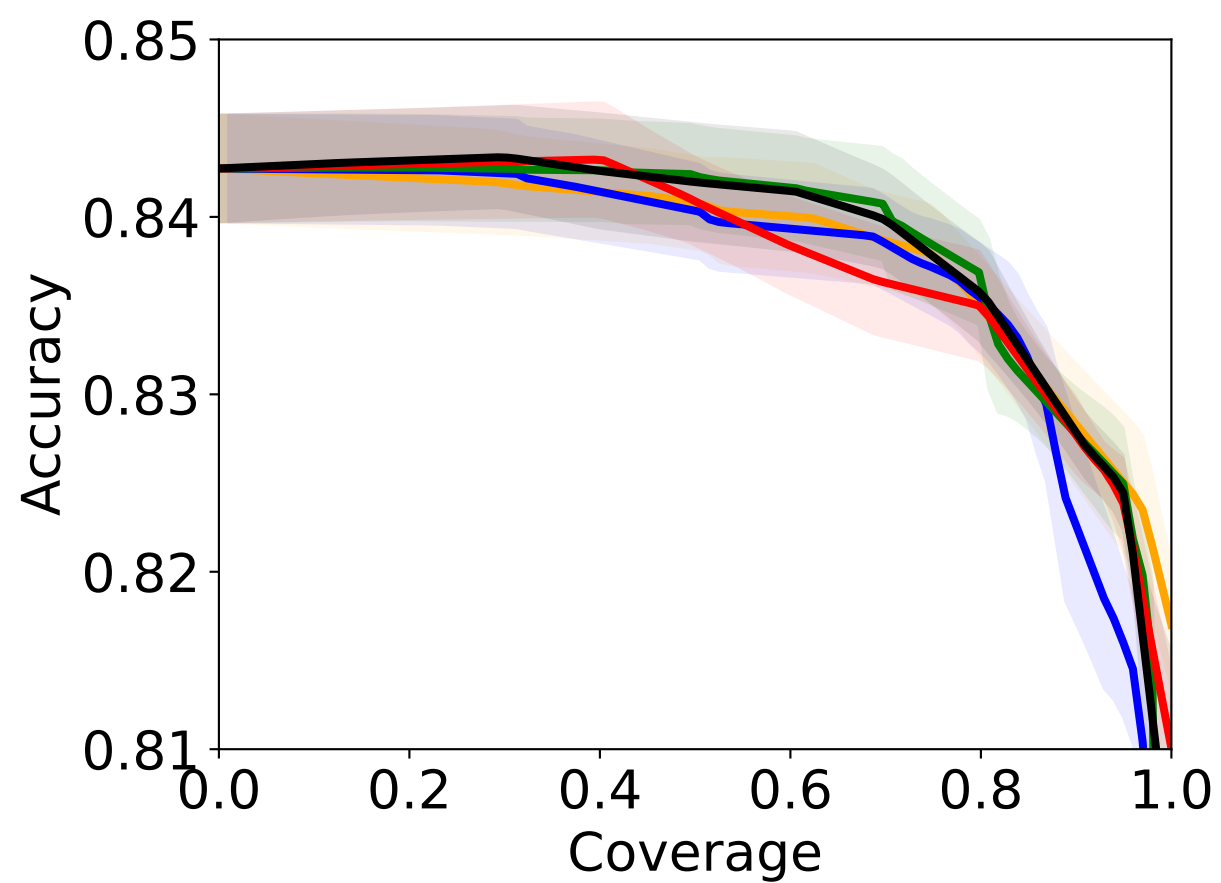

Supplement: supplementary_material [file attachment]

Low Transparency (0.25)

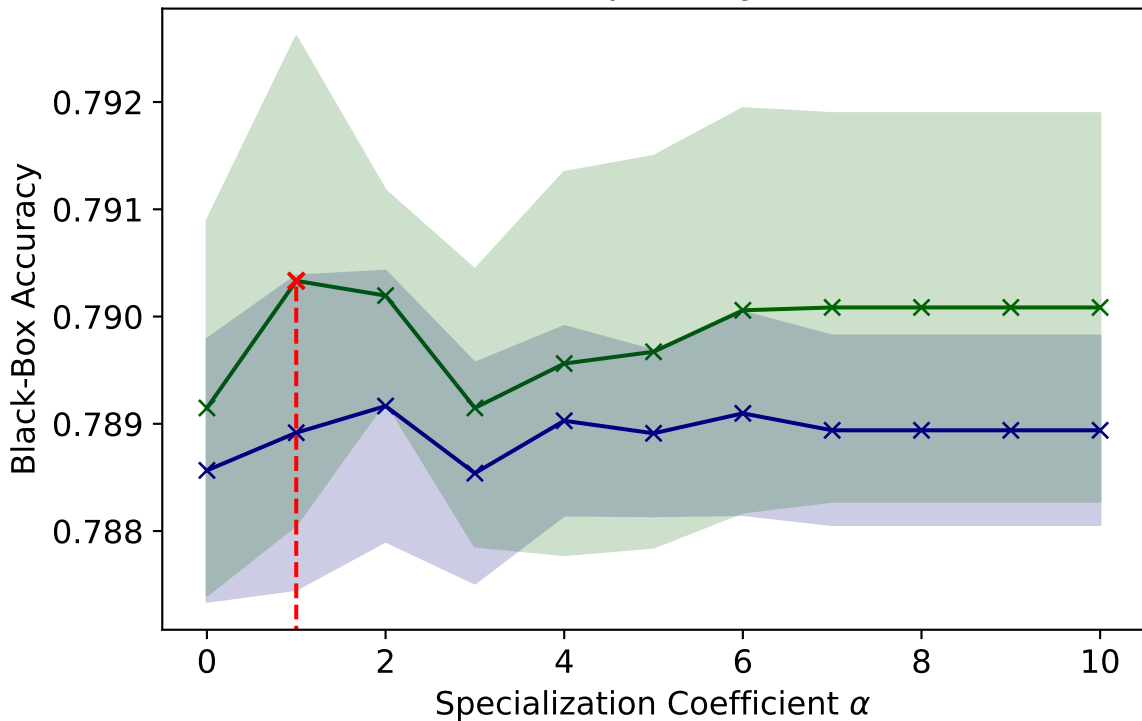

Supplement: supplementary_material [file attachment]

# High Transparency (0.75)

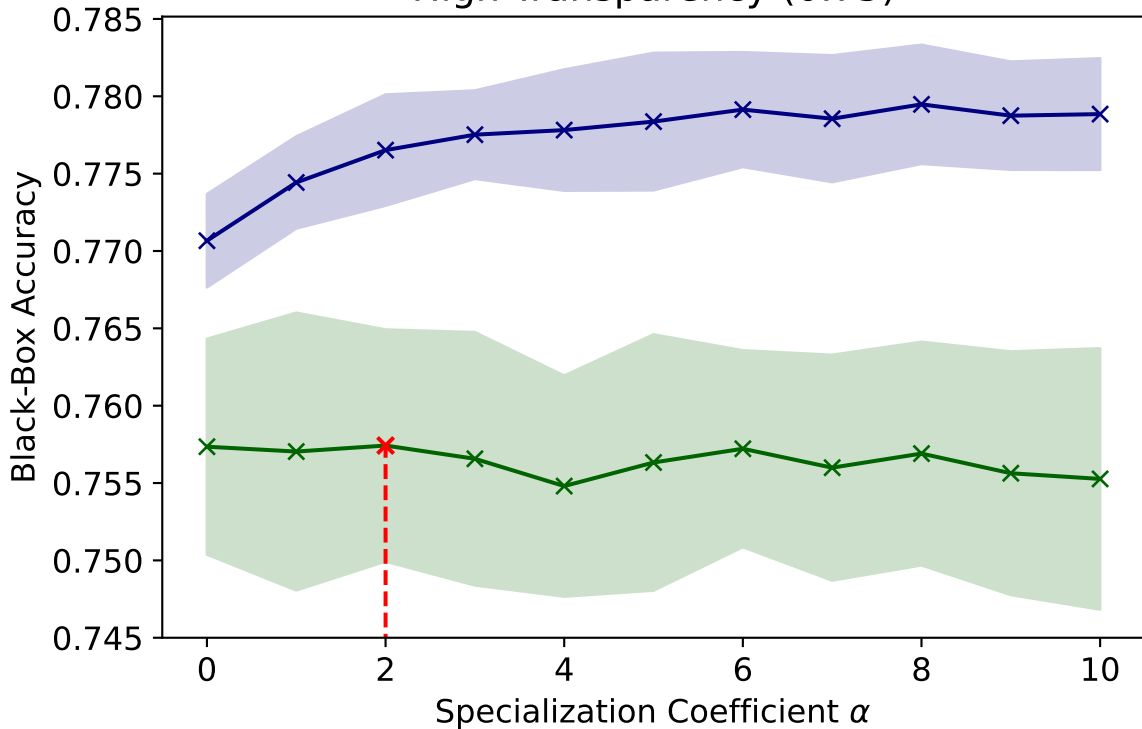

Supplement: supplementary_material [file attachment]

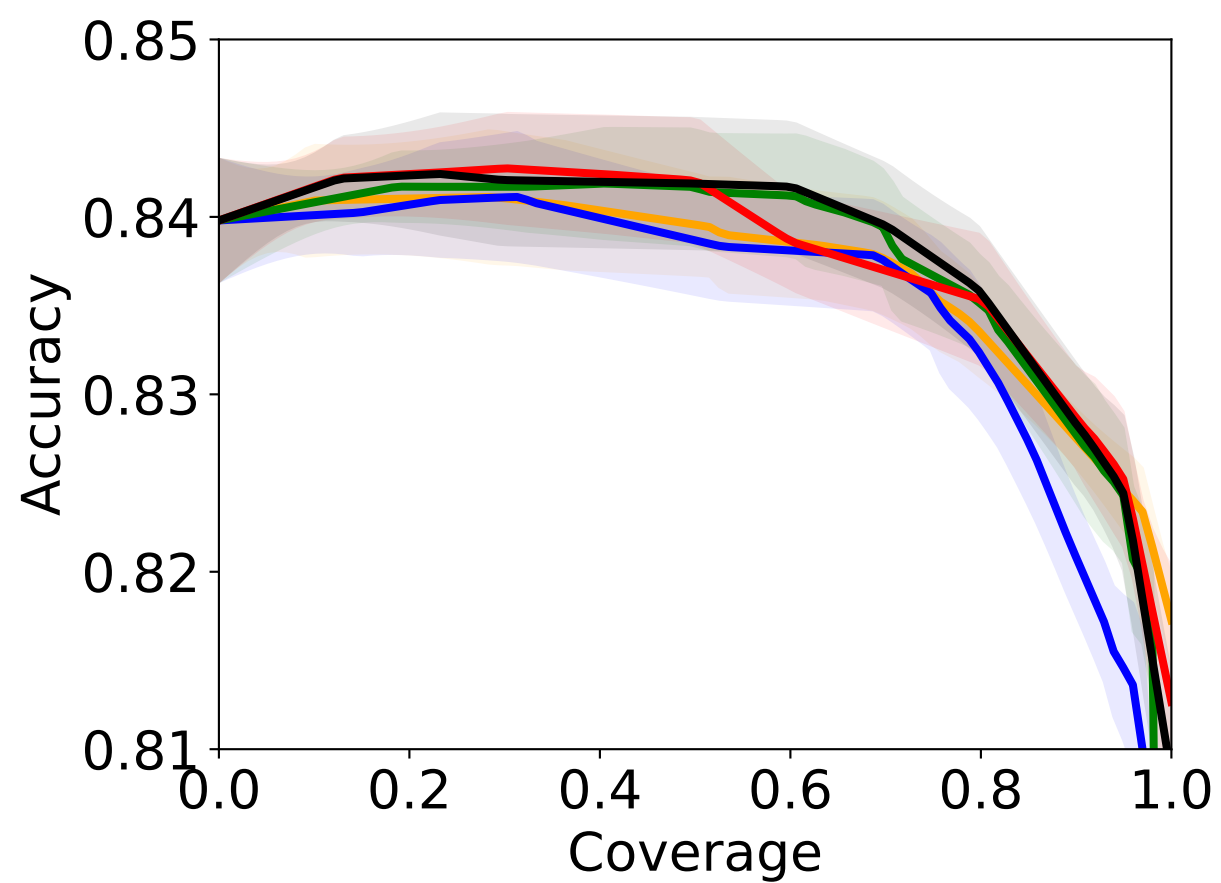

Supplement: supplementary_material [file attachment]

Low Transparency (0.25)

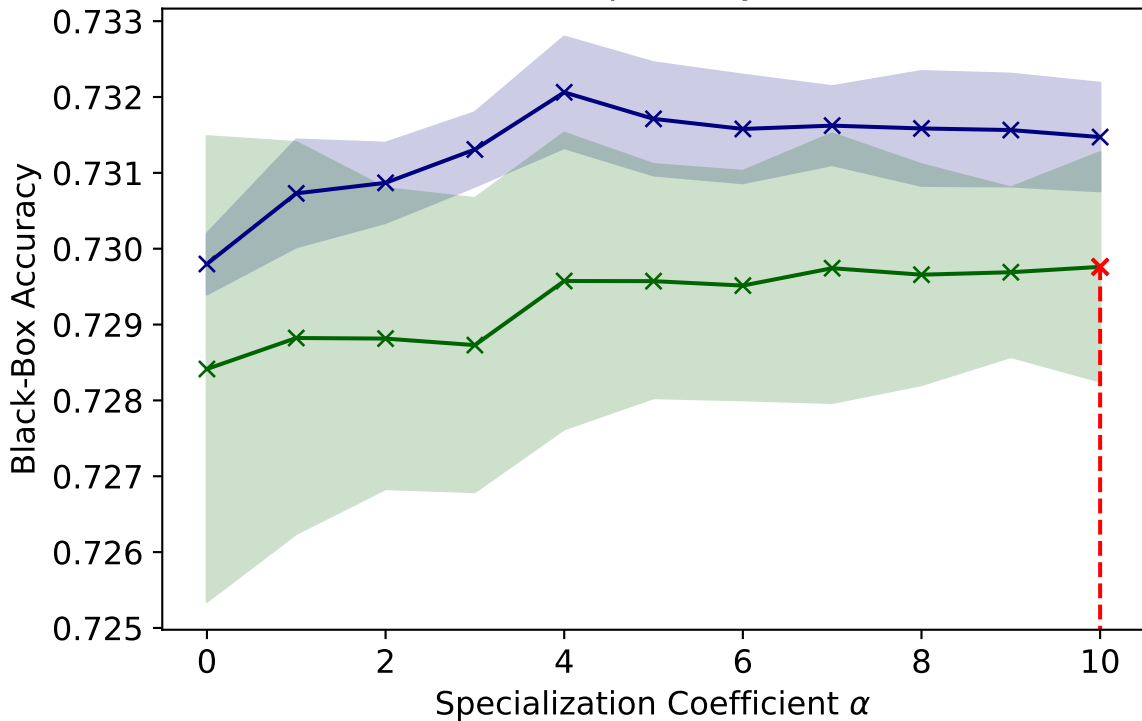

Supplement: supplementary_material [file attachment]

Very High Transparency (0.95)

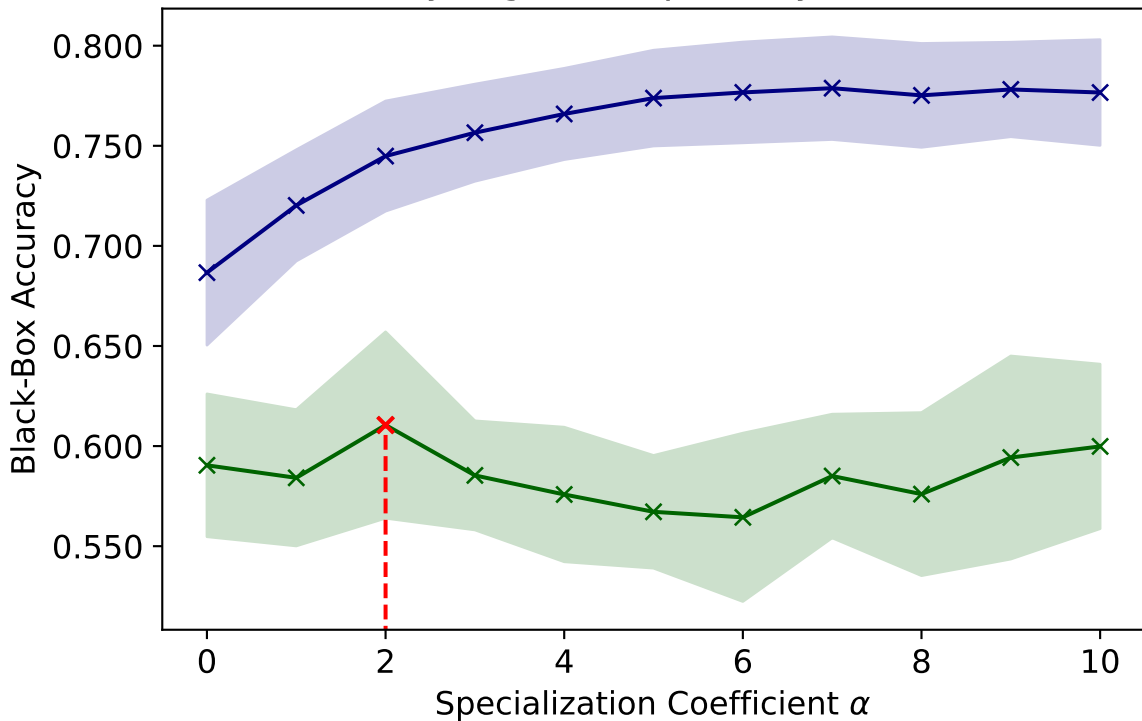

Supplement: supplementary_material [file attachment]

Medium Transparency (0.50)

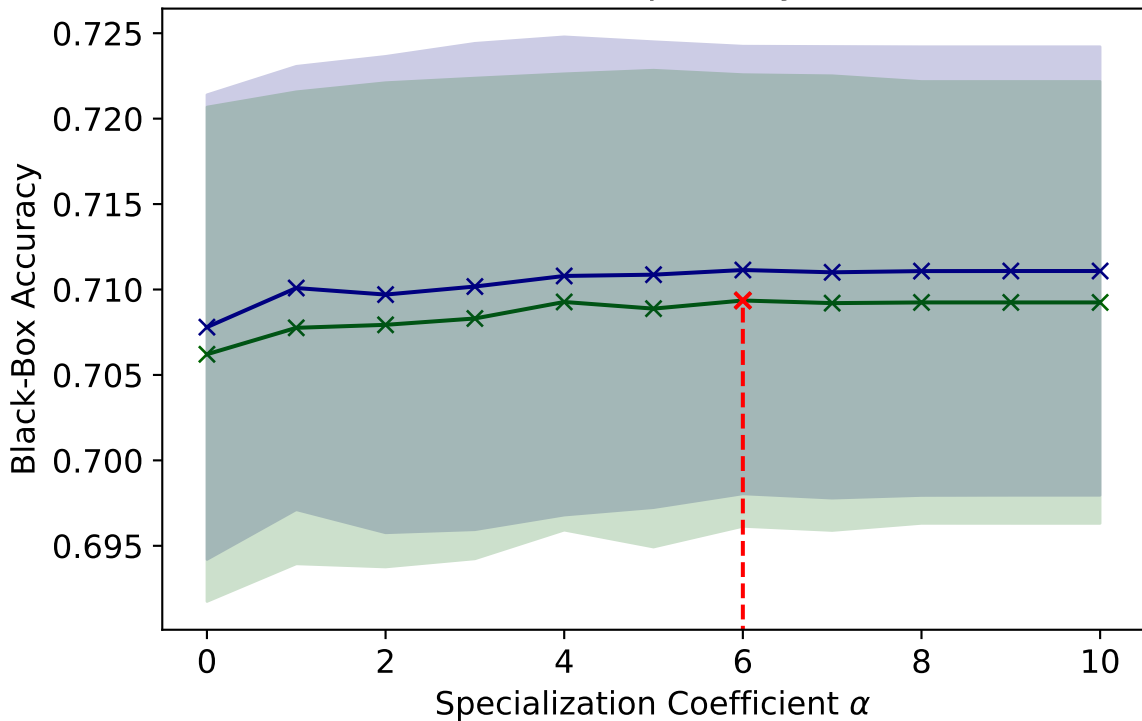

Supplement: supplementary_material [file attachment]

High Transparency (0.85)

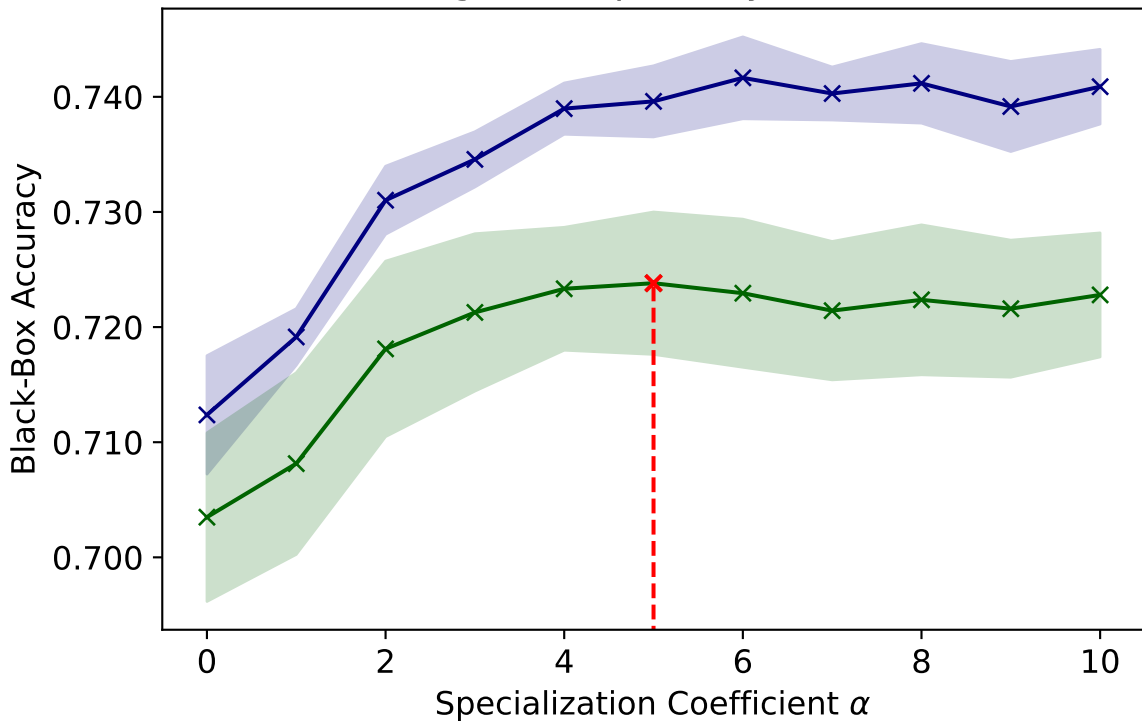

Supplement: supplementary_material [file attachment]

Very High Transparency (0.95)

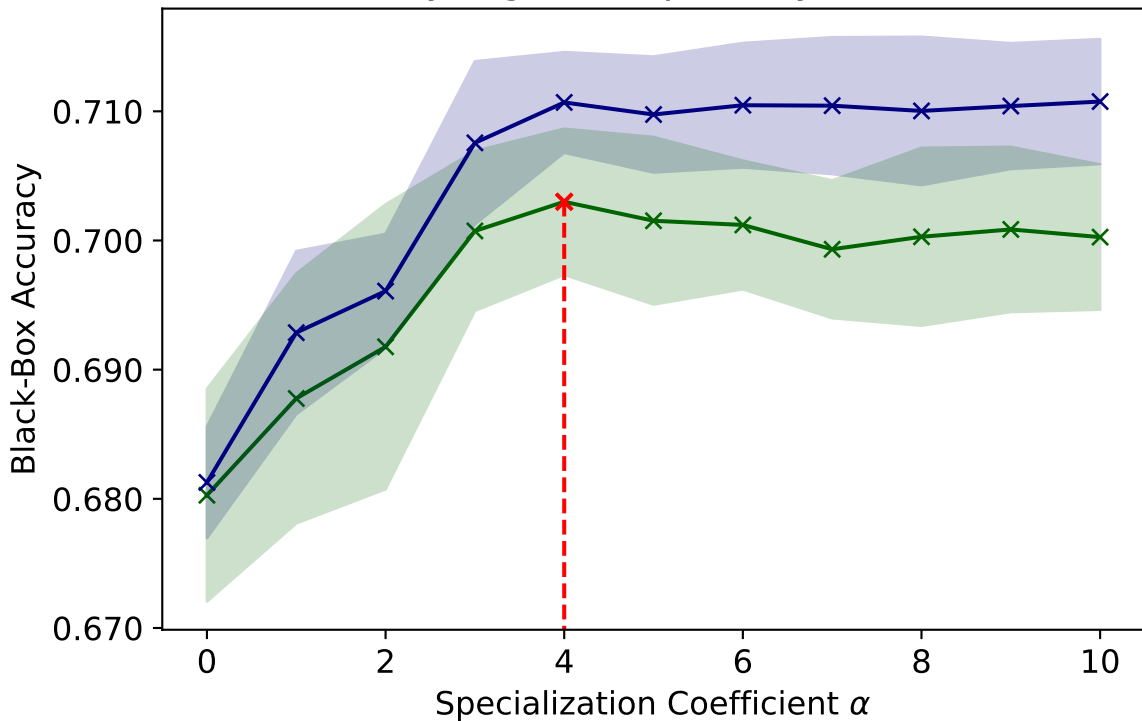

Supplement: supplementary_material [file attachment]

High Transparency (0.85)

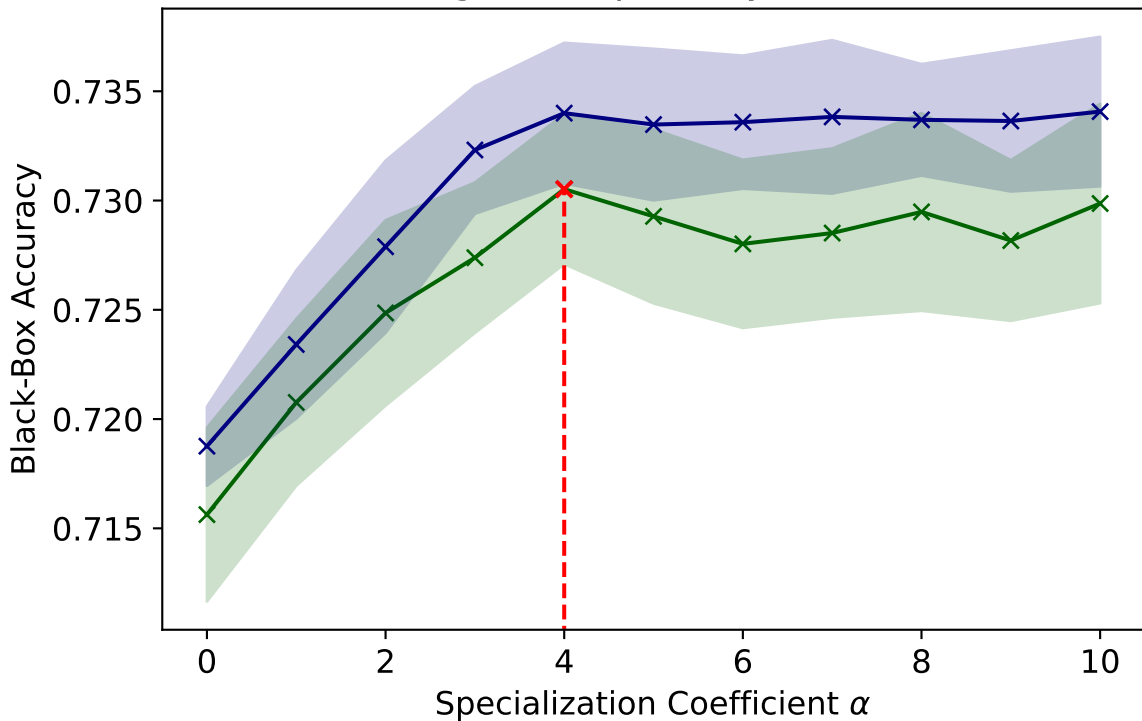

Supplement: supplementary_material [file attachment]

Very High Transparency (0.95)

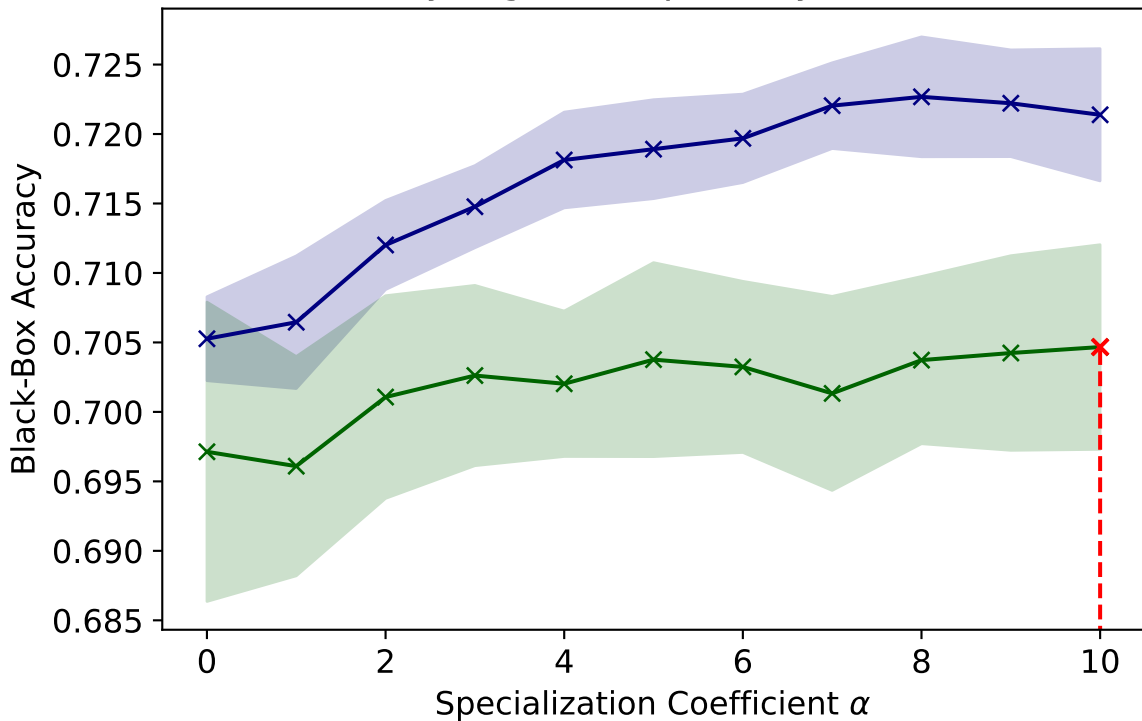

Supplement: supplementary_material [file attachment]

# High Transparency (0.75)

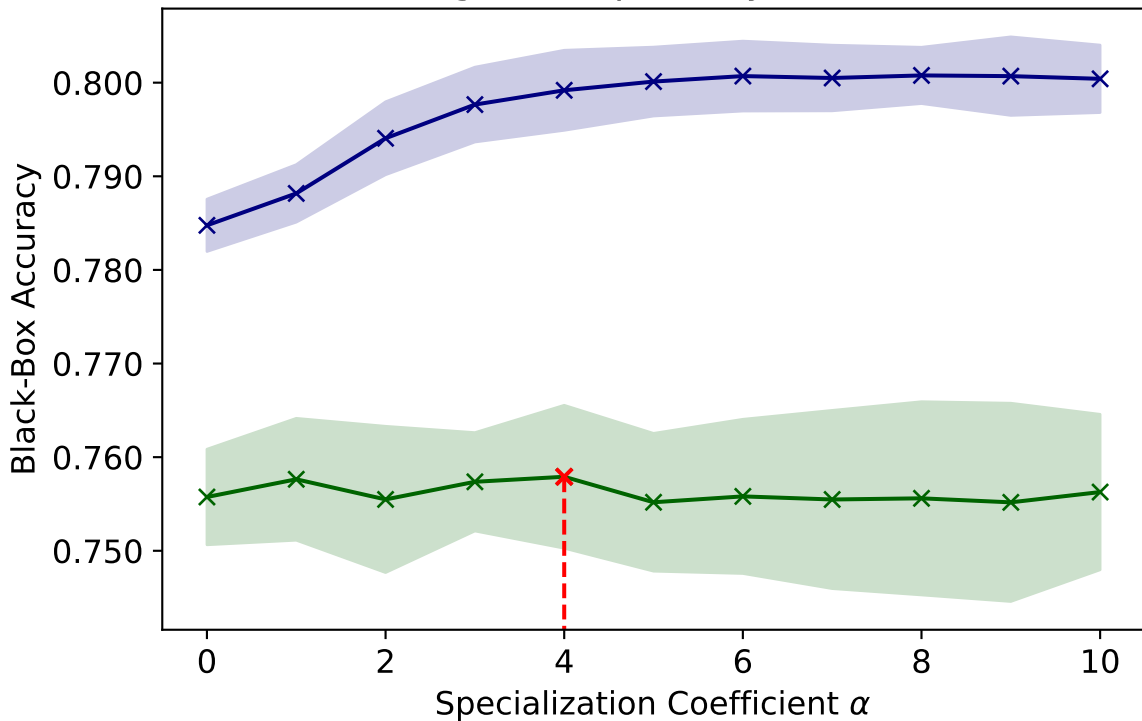

Supplement: supplementary_material [file attachment]

High Transparency (0.85)

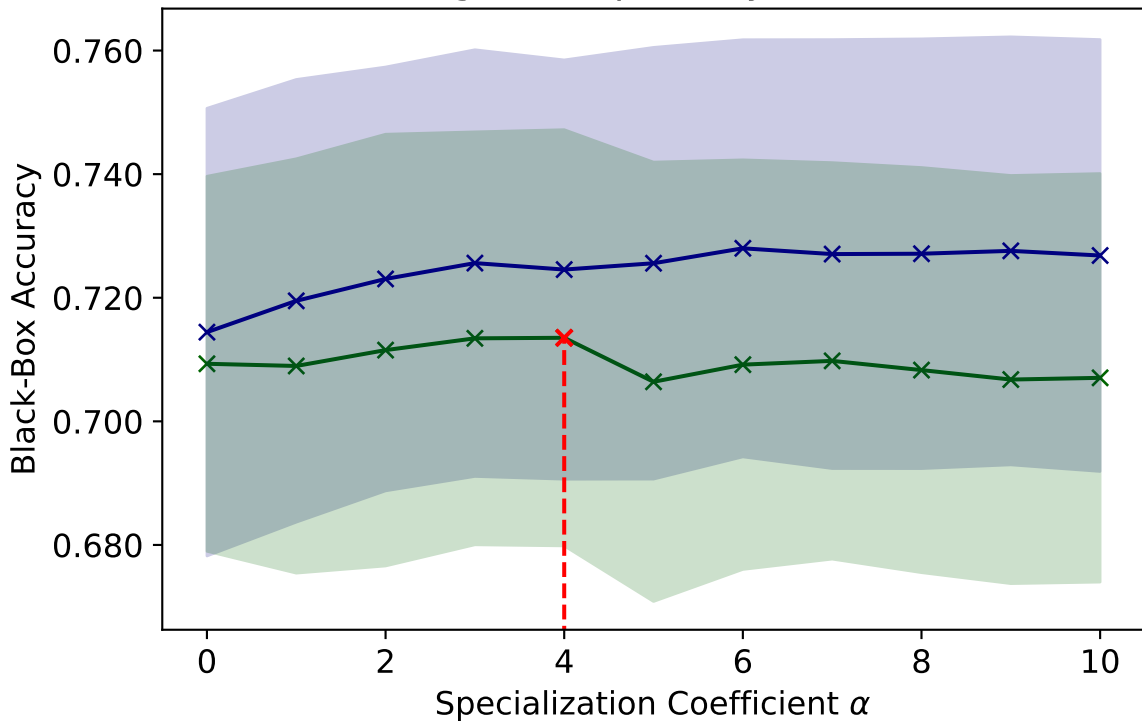

Supplement: supplementary_material [file attachment]

High Transparency (0.75)

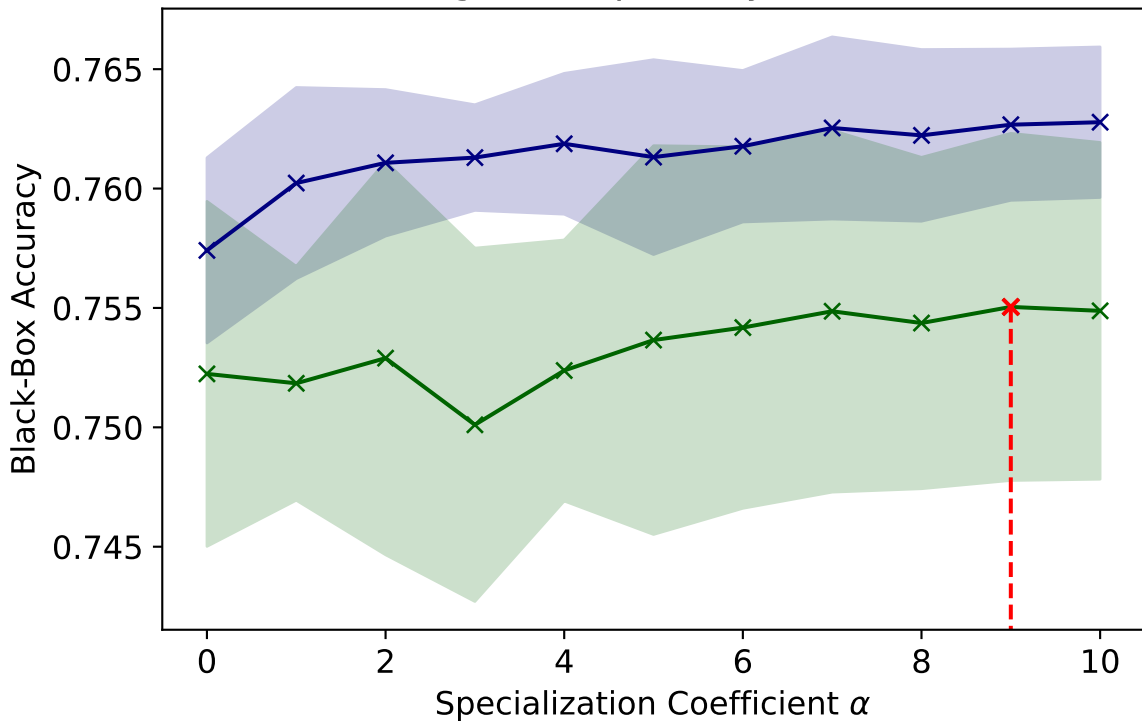

Supplement: supplementary_material [file attachment]

Very High Transparency (0.95)

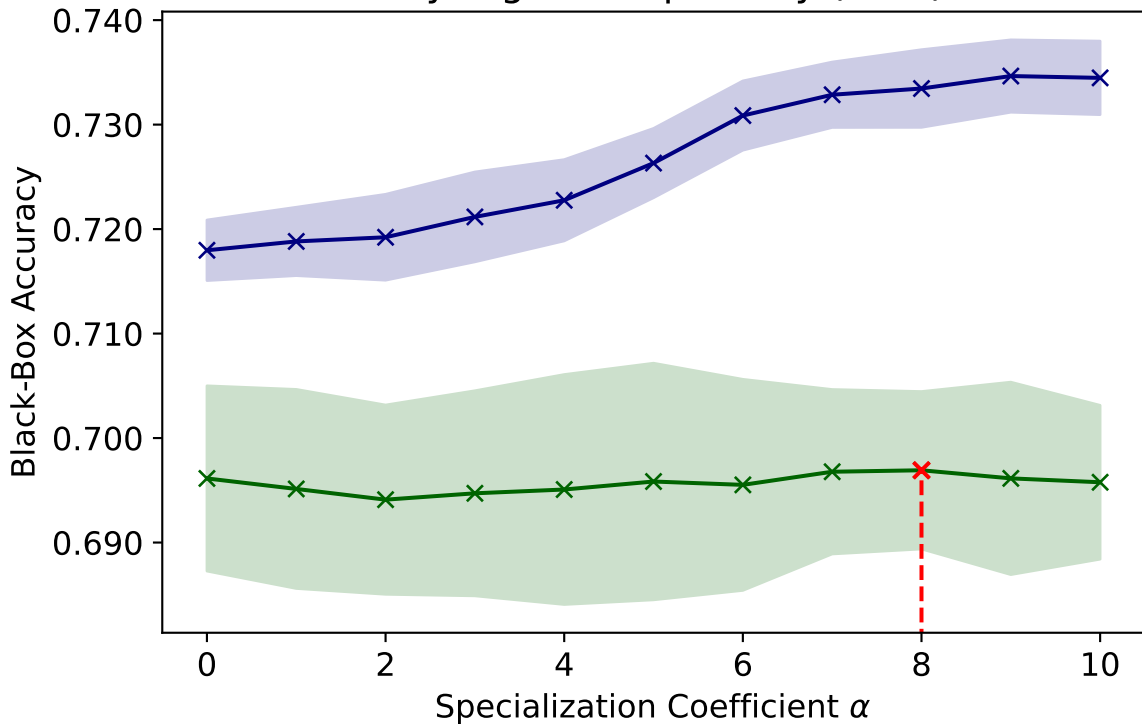

Supplement: supplementary_material [file attachment]

Low Transparency (0.25)

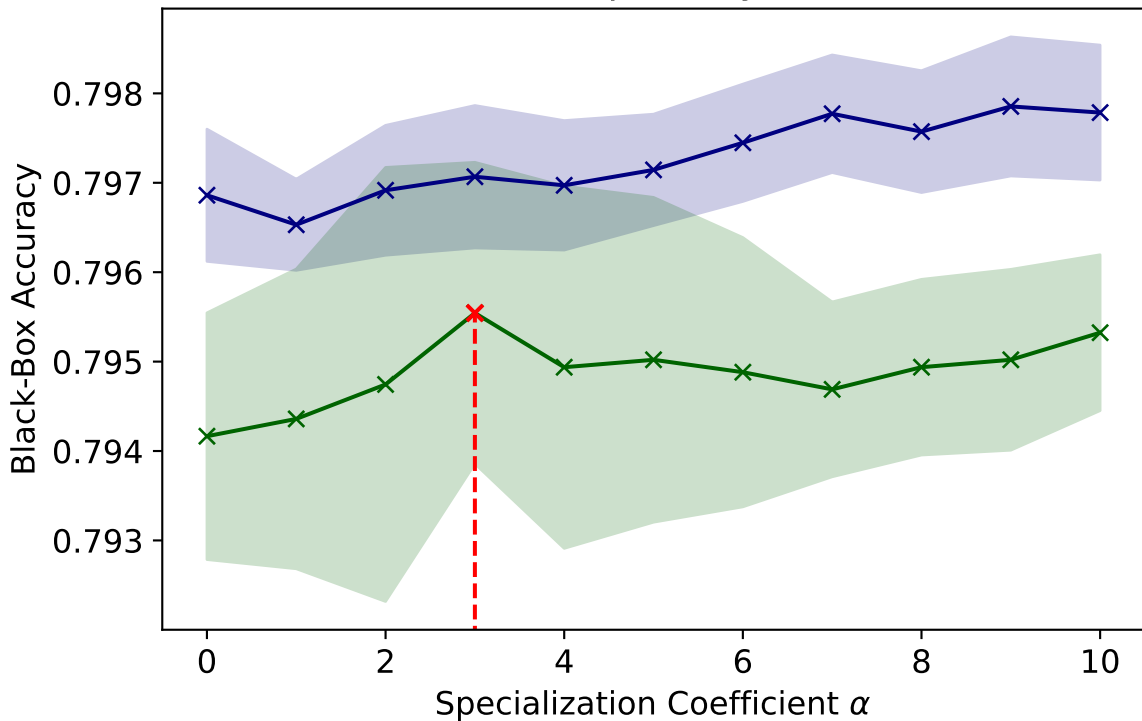

Supplement: supplementary_material [file attachment]

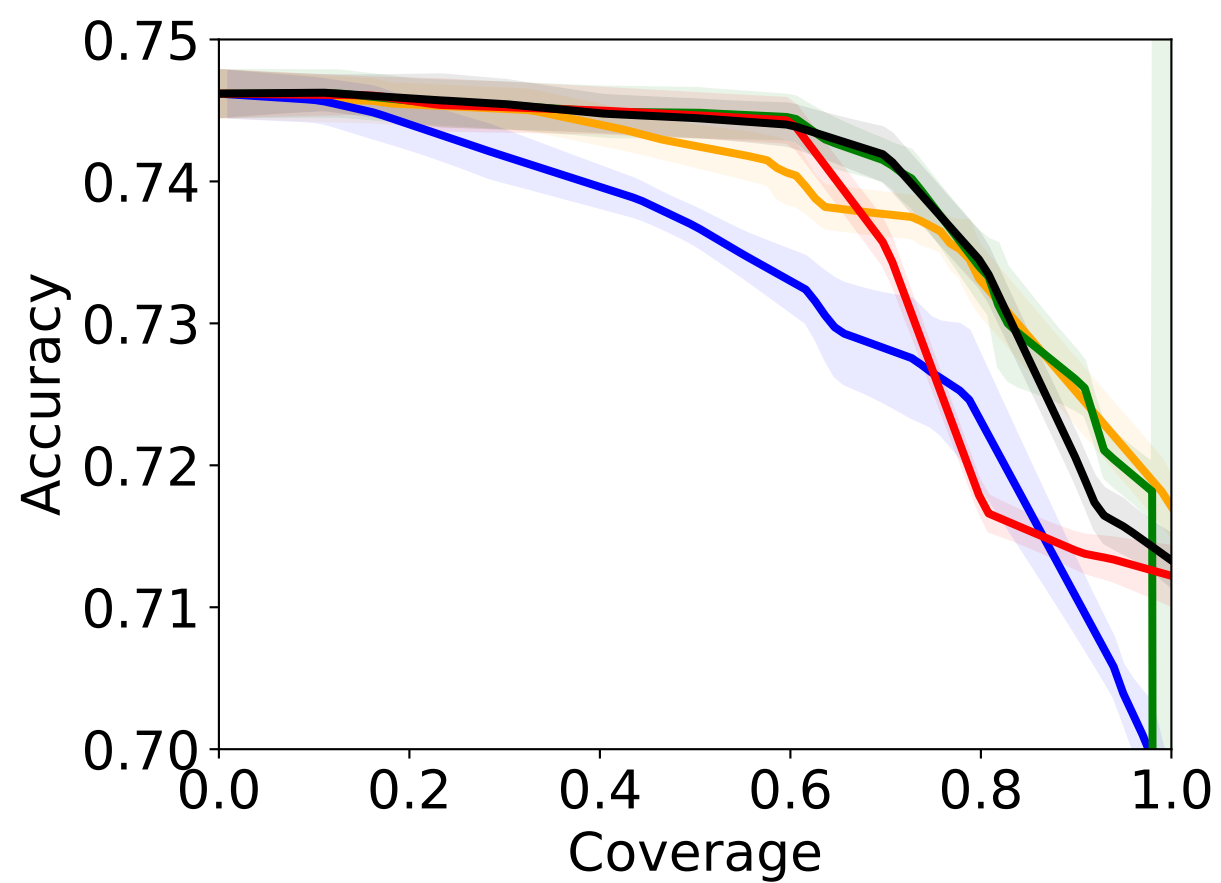

Supplement: supplementary_material [file attachment]

# High Transparency (0.85)

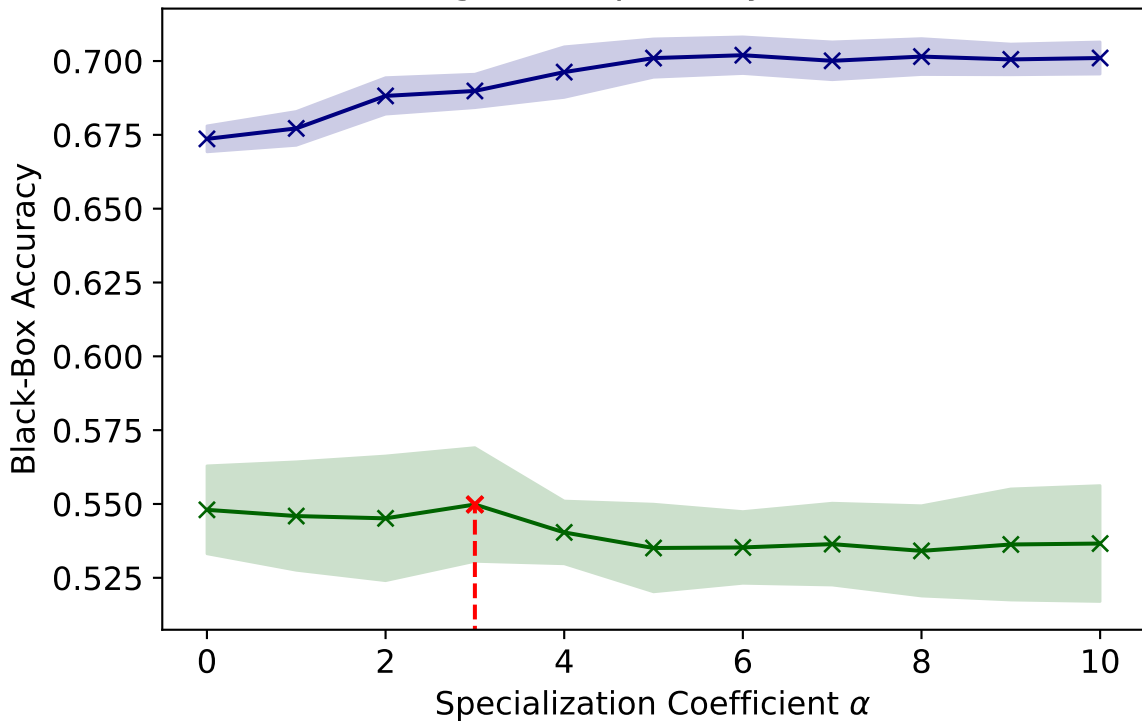

Supplement: supplementary_material [file attachment]

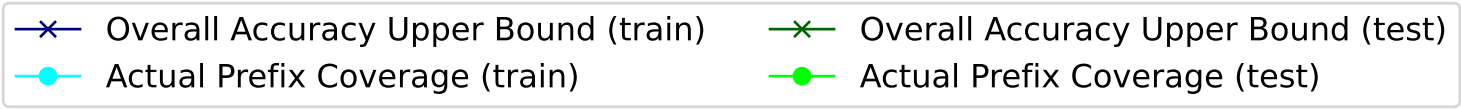

Supplement: supplementary_material [file attachment]

Very High Transparency (0.95)

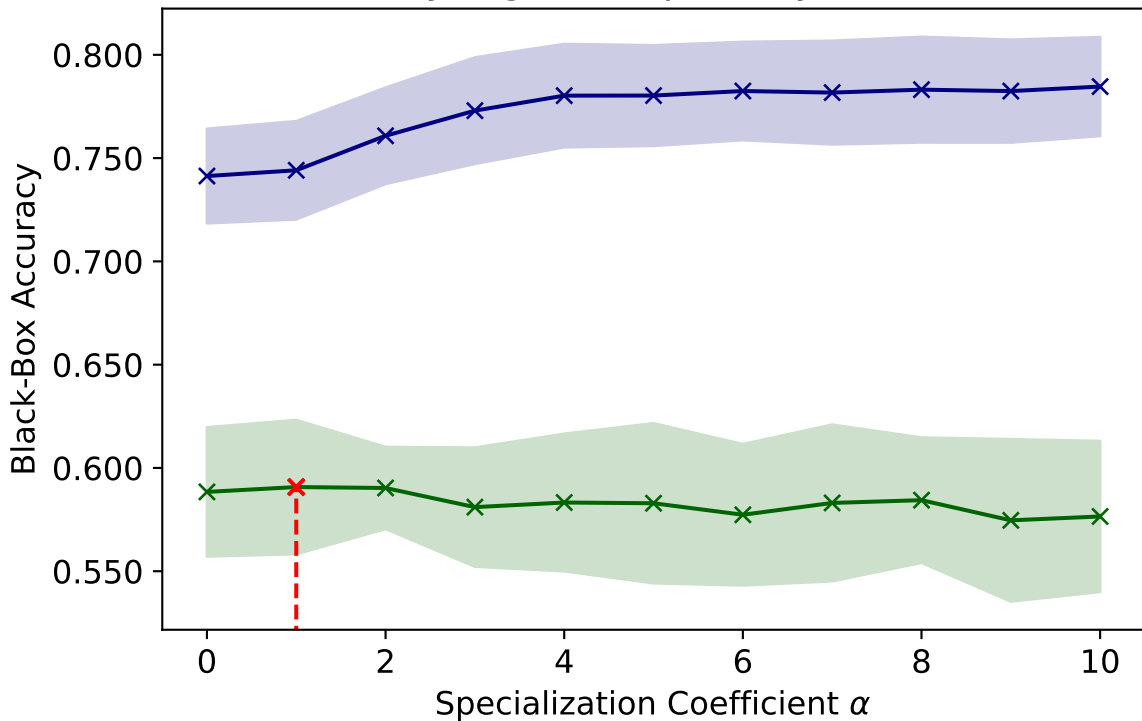

Supplement: supplementary_material [file attachment]

Medium Transparency (0.50)

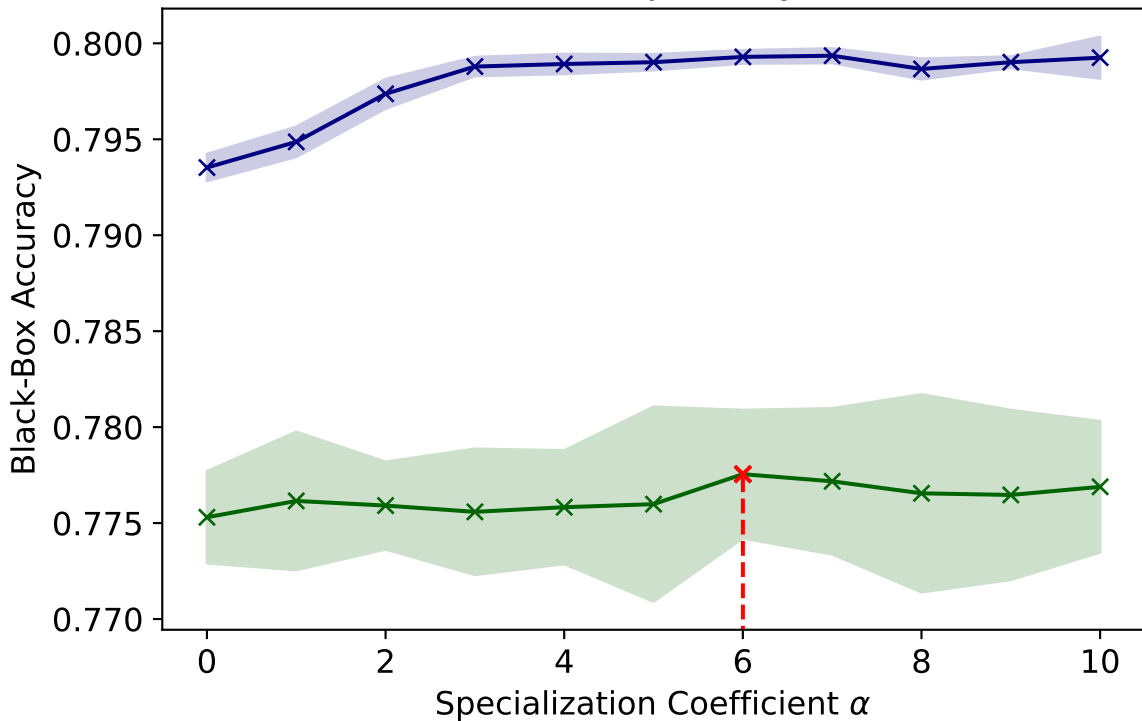

Supplement: supplementary_material [file attachment]

Overall Accuracy Upper Bound

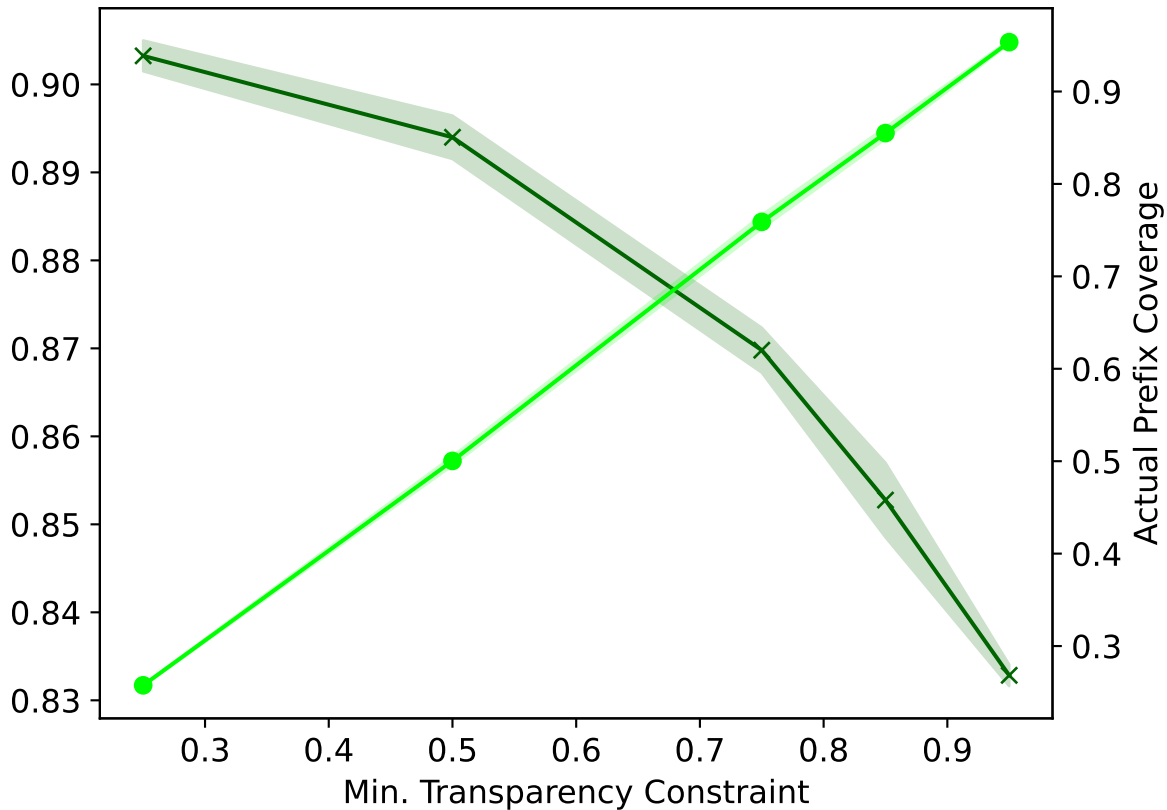

Supplement: supplementary_material [file attachment]

Overall Accuracy Upper Bound

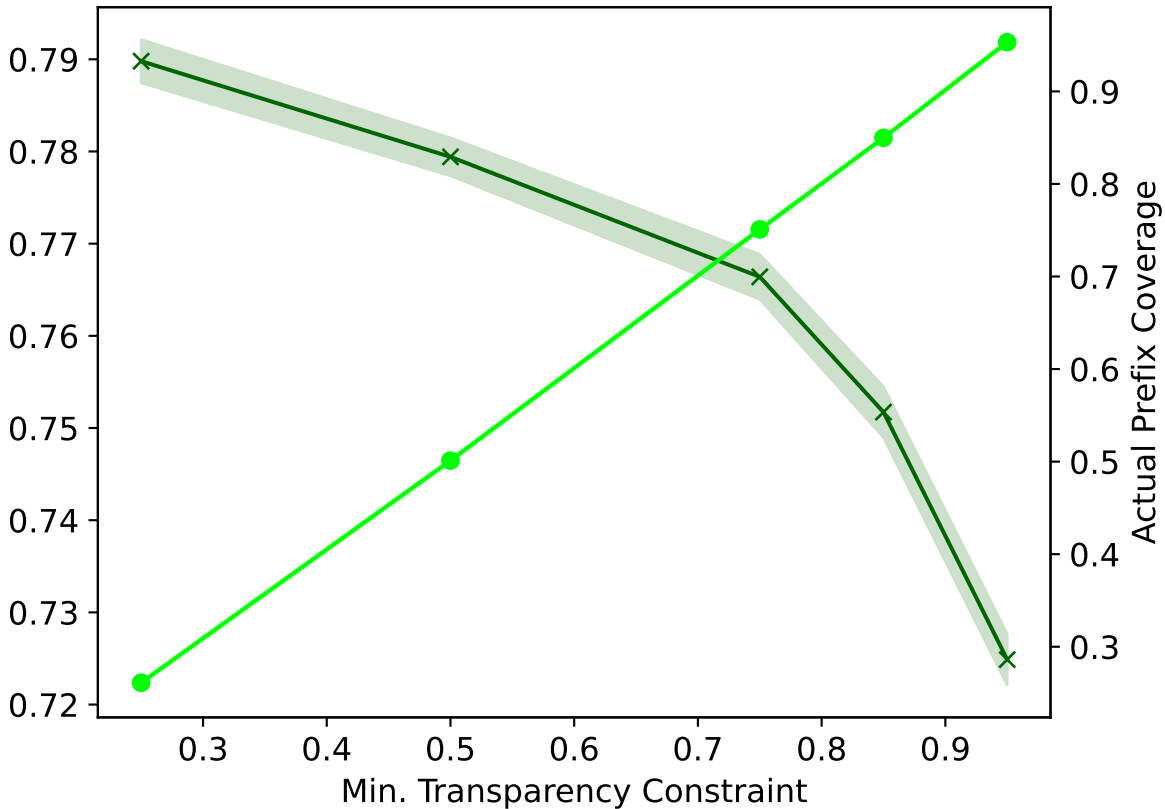

Supplement: supplementary_material [file attachment]

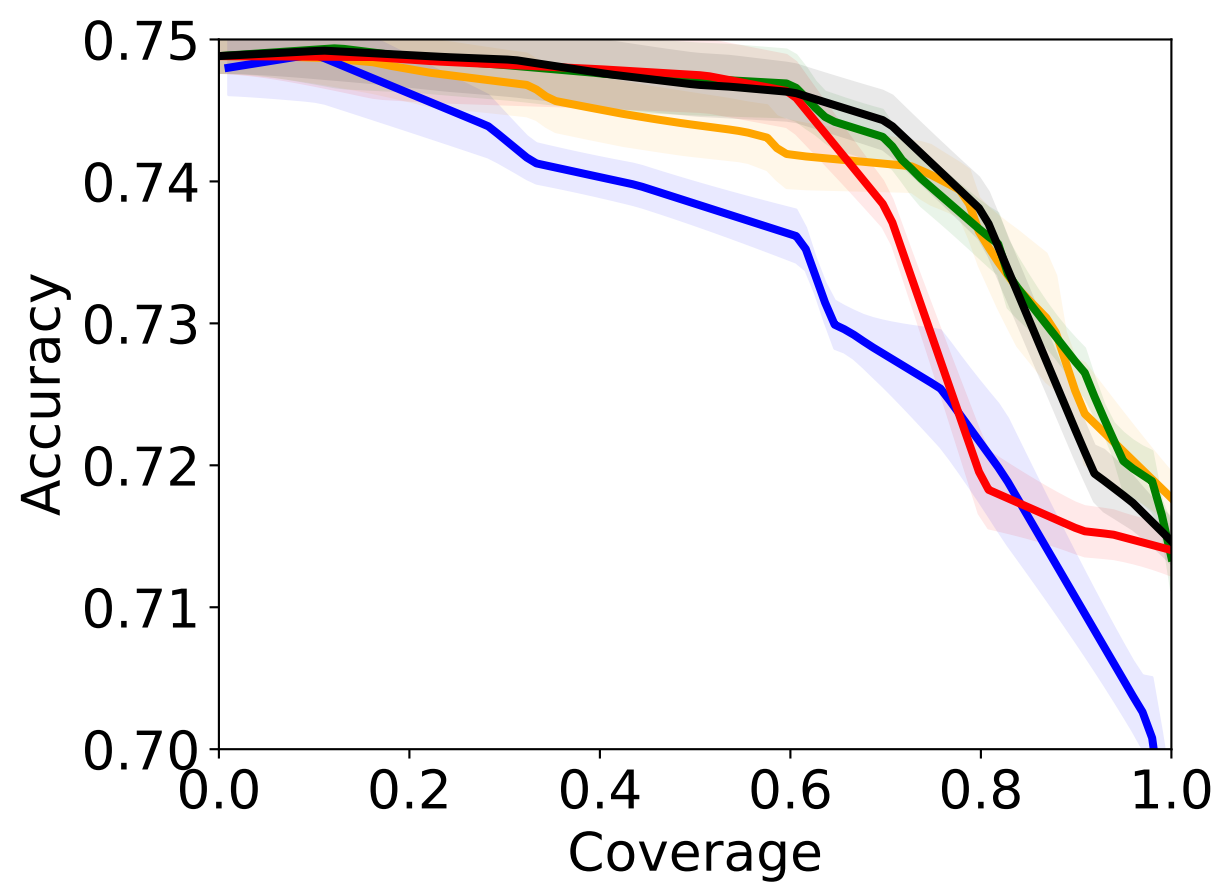

Supplement: supplementary_material [file attachment]

Medium Transparency (0.50)

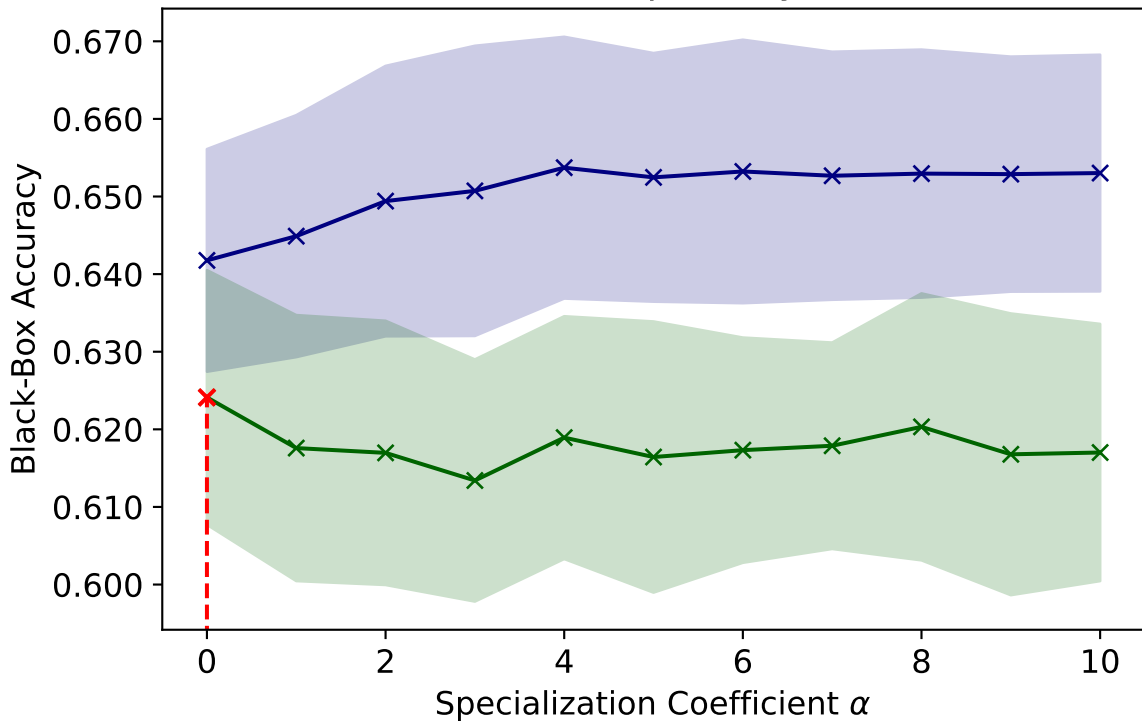

Supplement: supplementary_material [file attachment]

Low Transparency (0.25)

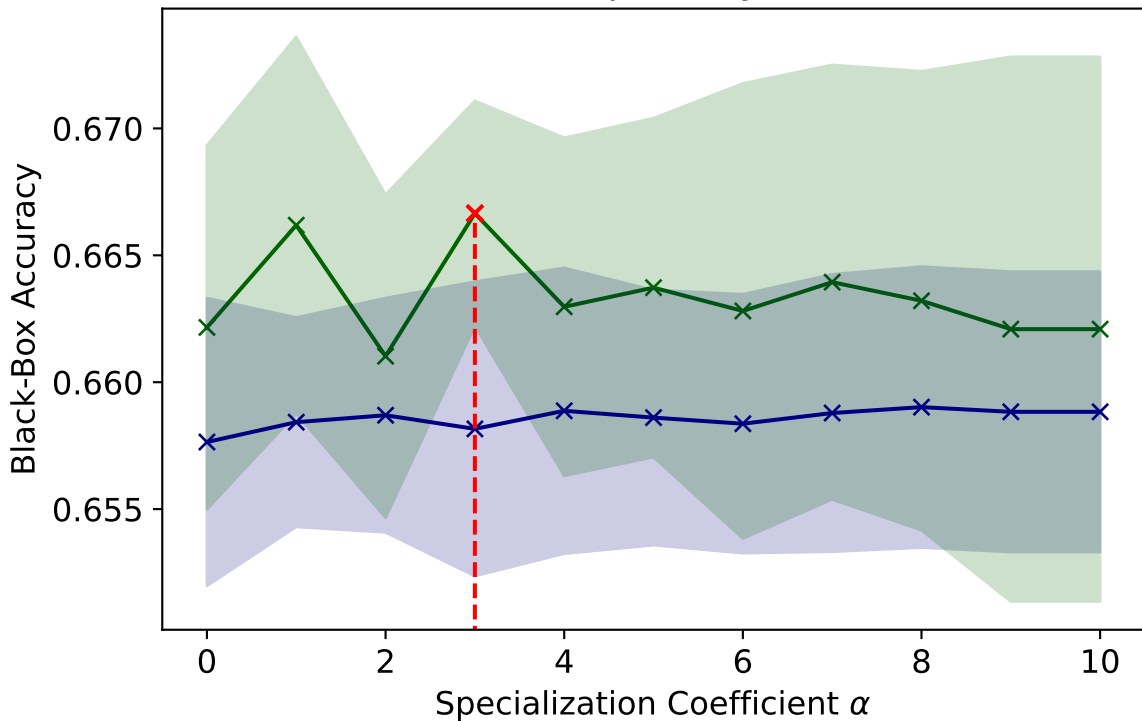

Supplement: supplementary_material [file attachment]

Medium Transparency (0.50)

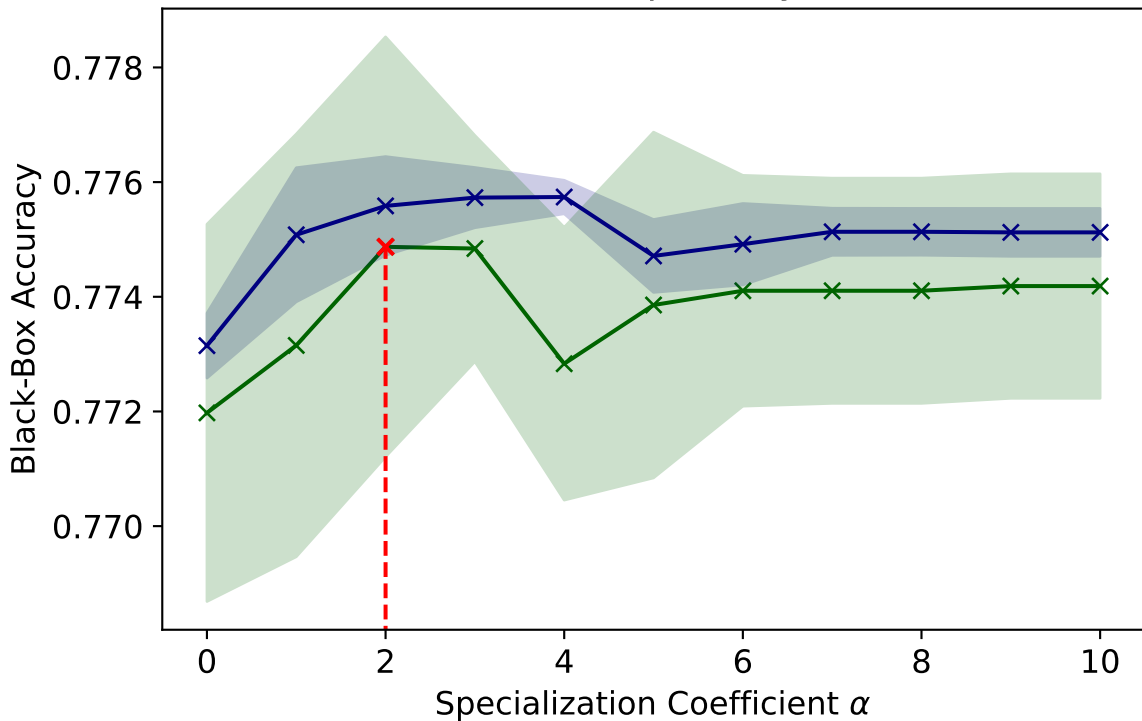

Supplement: supplementary_material [file attachment]

Very High Transparency (0.95)

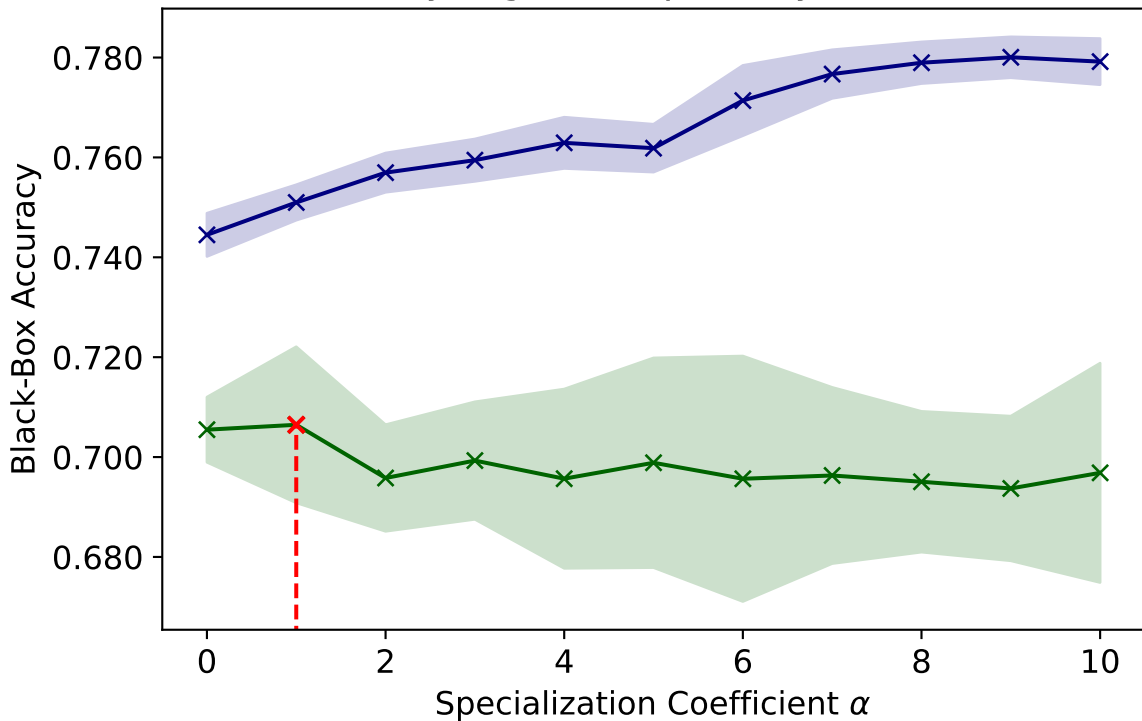

Supplement: supplementary_material [file attachment]

Low Transparency (0.25)

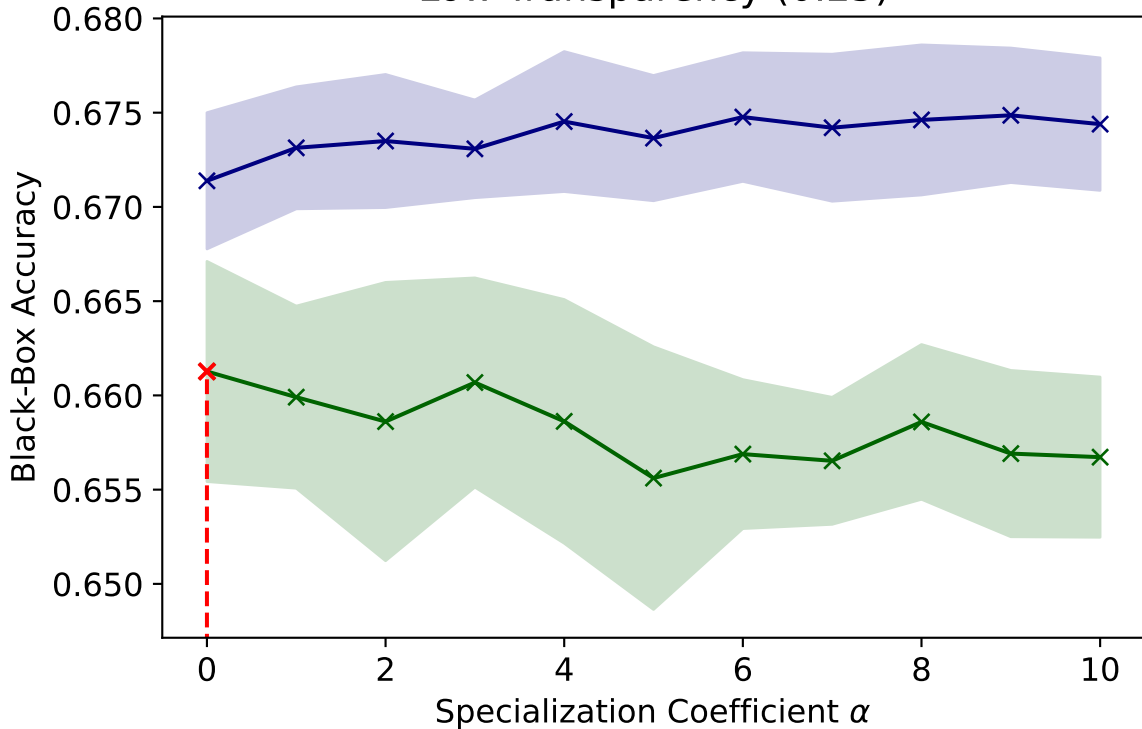

Supplement: supplementary_material [file attachment]

# High Transparency (0.75)

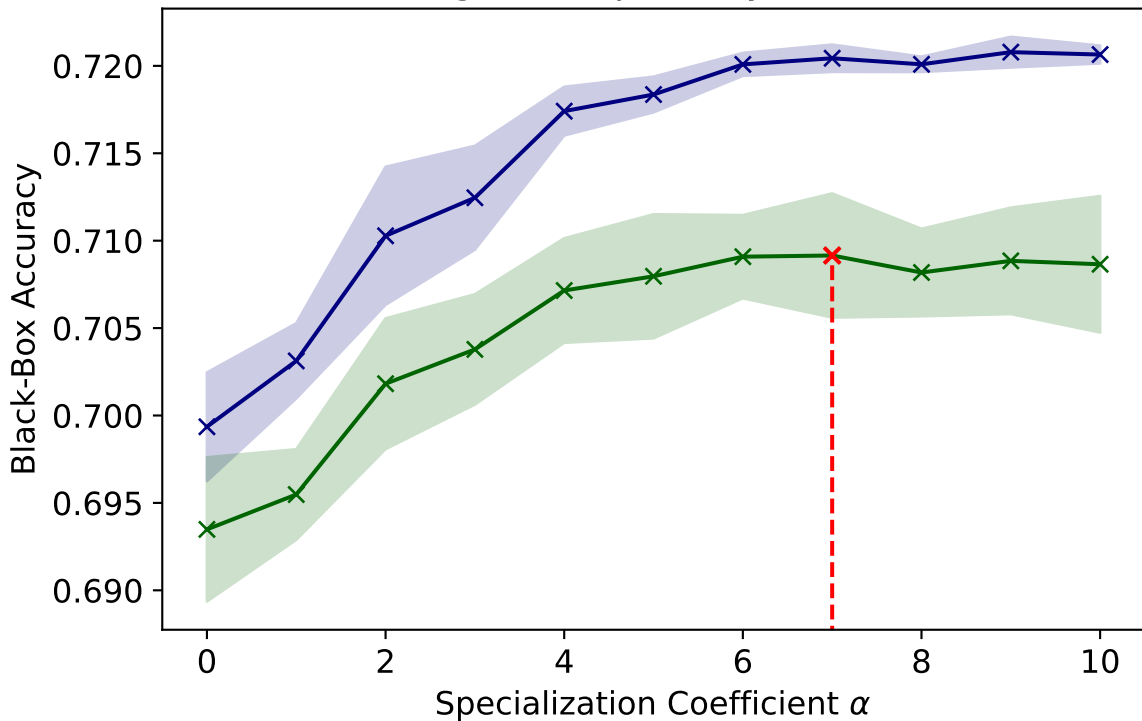

Supplement: supplementary_material [file attachment]

## Very High Transparency (0.95)

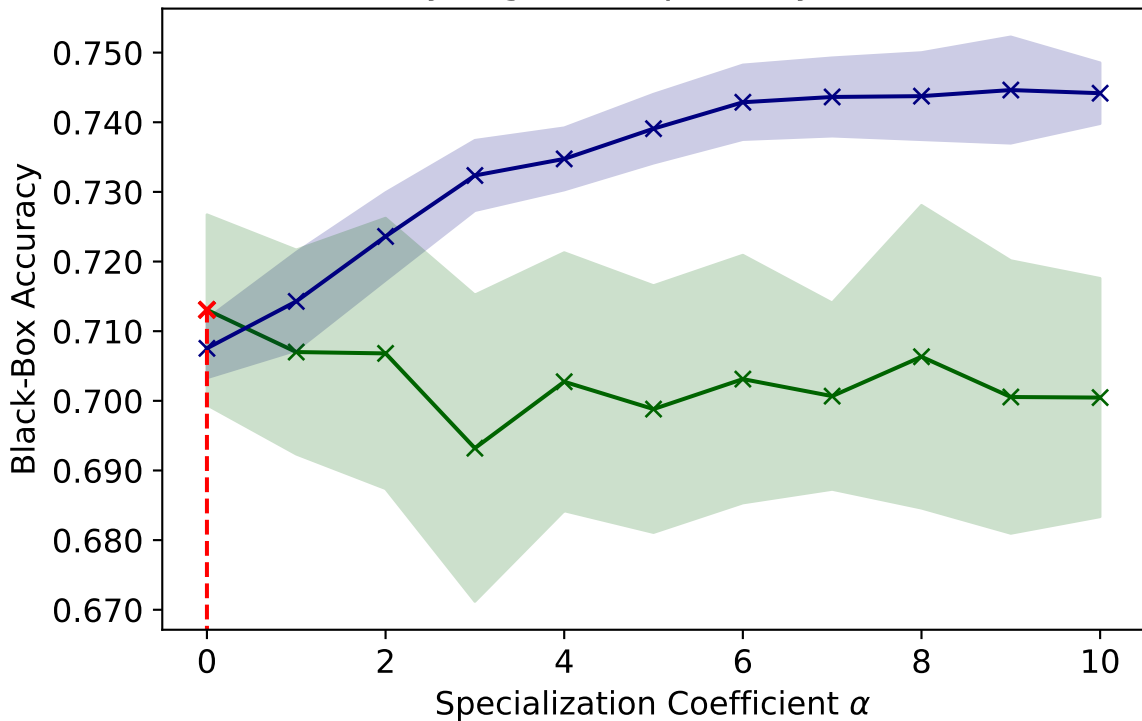

Supplement: supplementary_material [file attachment]

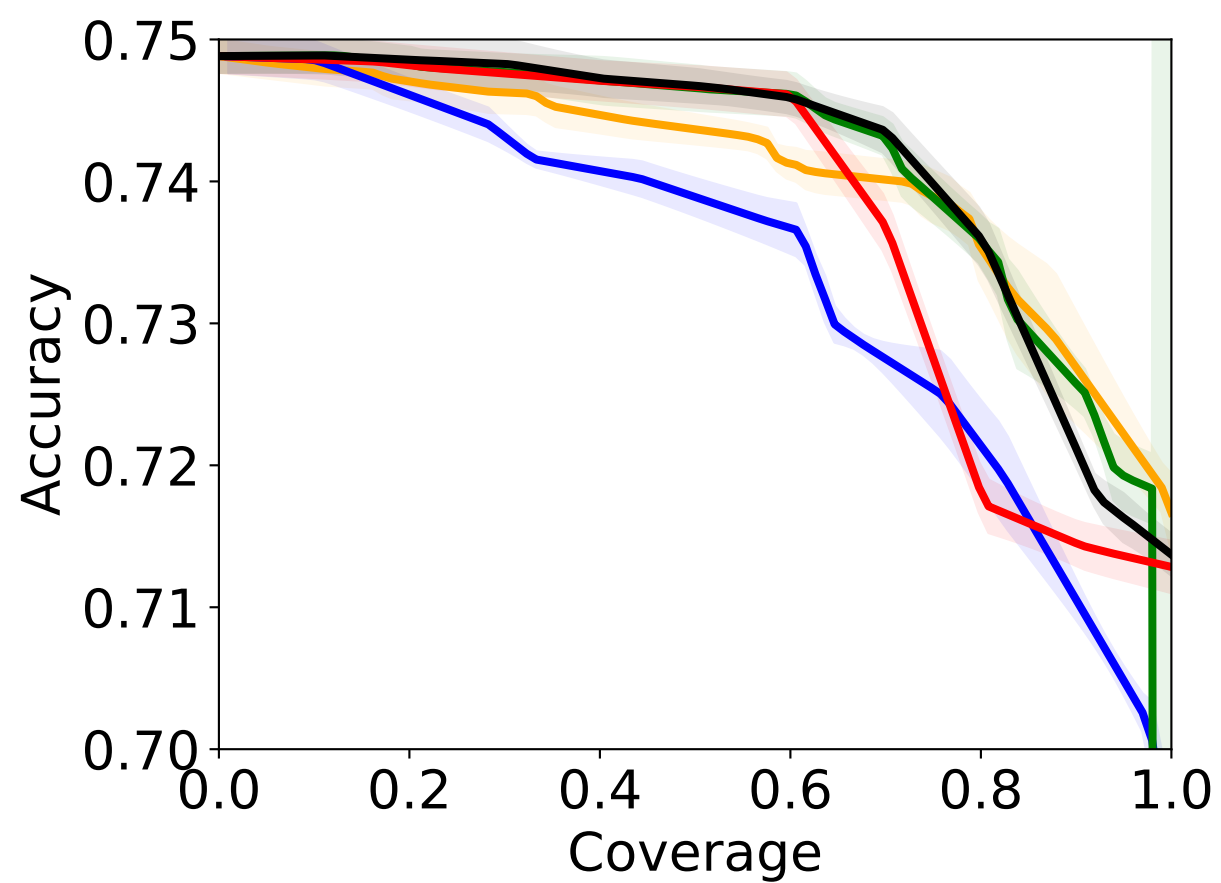

Supplement: supplementary_material [file attachment]

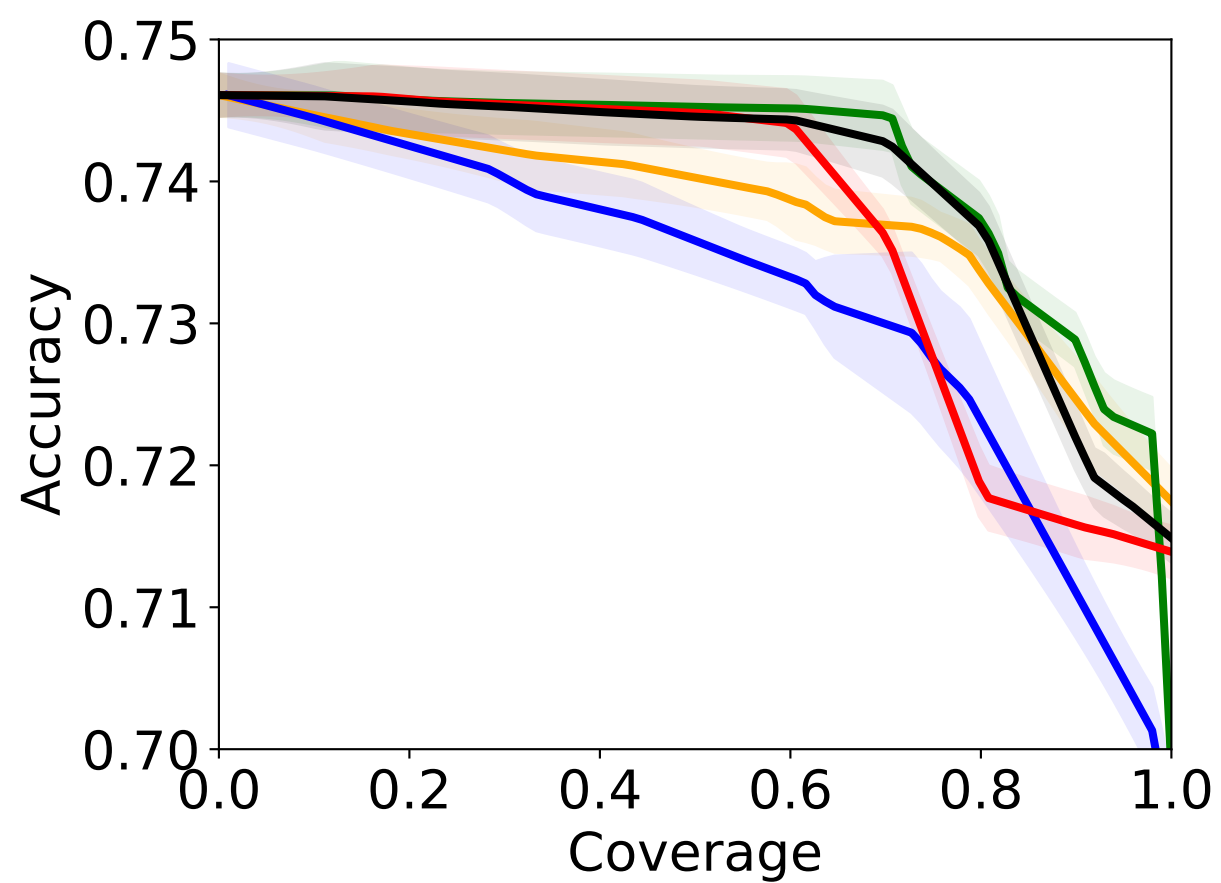

Supplement: supplementary_material [file attachment]

Overall Accuracy Upper Bound

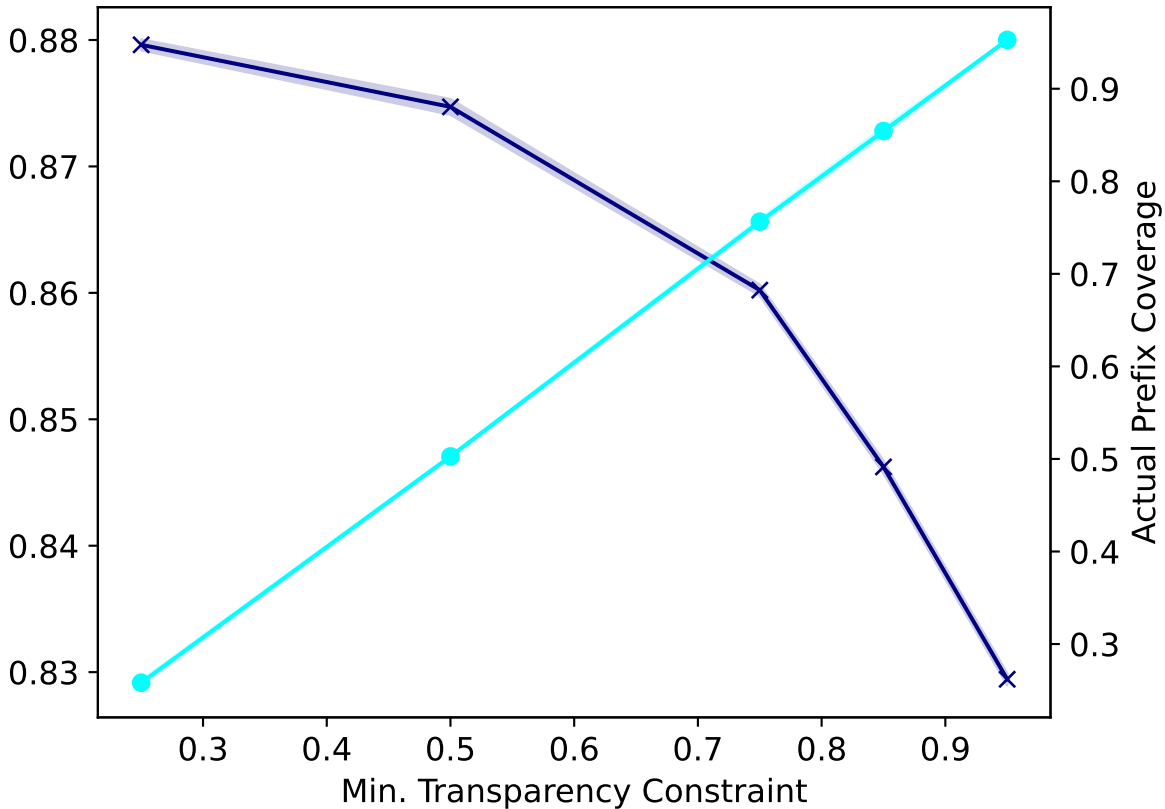

Supplement: supplementary_material [file attachment]

Overall Accuracy Upper Bound

0.710

0.705

0.700

0.695

0.690

0.685

0.3

0.4

0.5

0.6

0.7

0.8

0.9

Min. Transparency Constraint

Actual Prefix Coverage

0.9

0.8

0.7

0.6

0.5

0.4

0.3

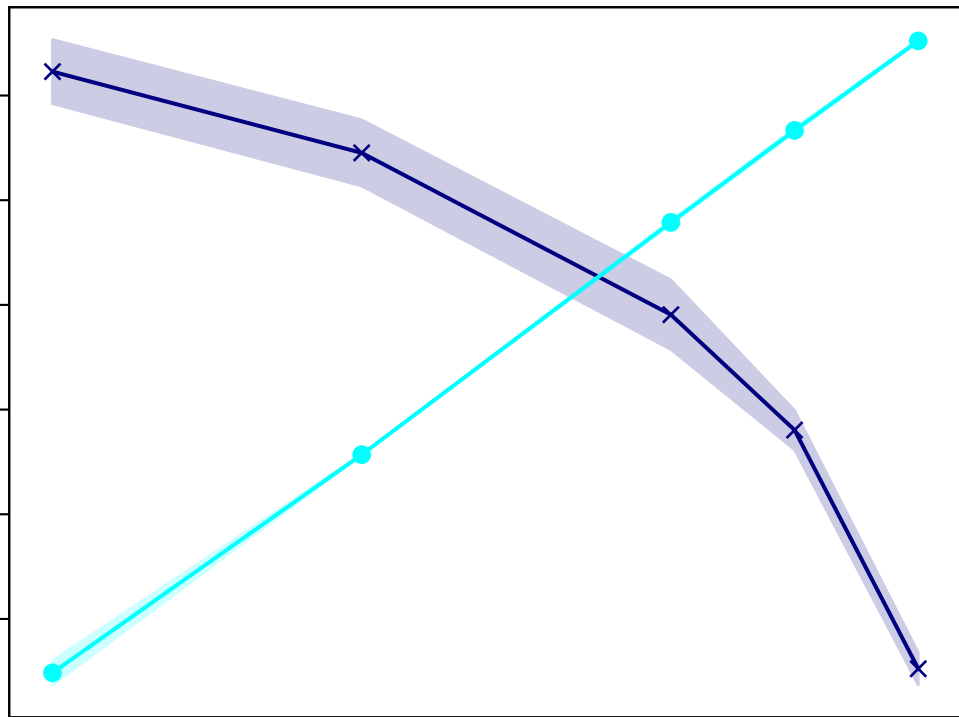

Supplement: supplementary_material [file attachment]

Medium Transparency (0.50)

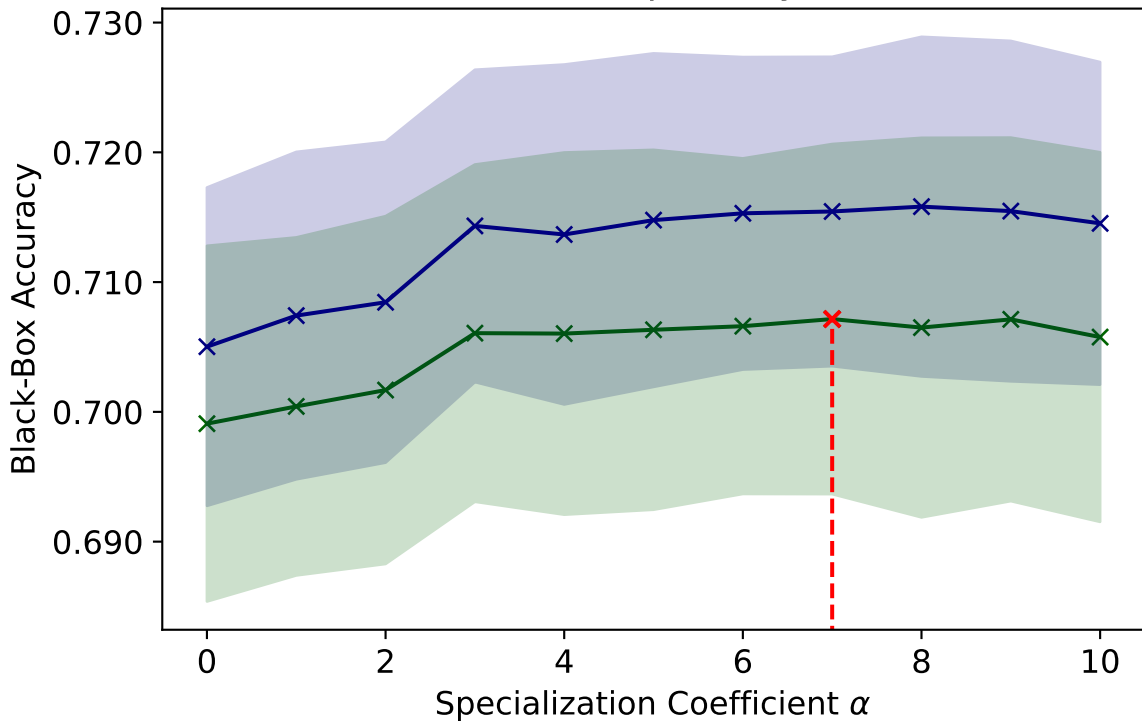

Supplement: supplementary_material [file attachment]

# High Transparency (0.85)

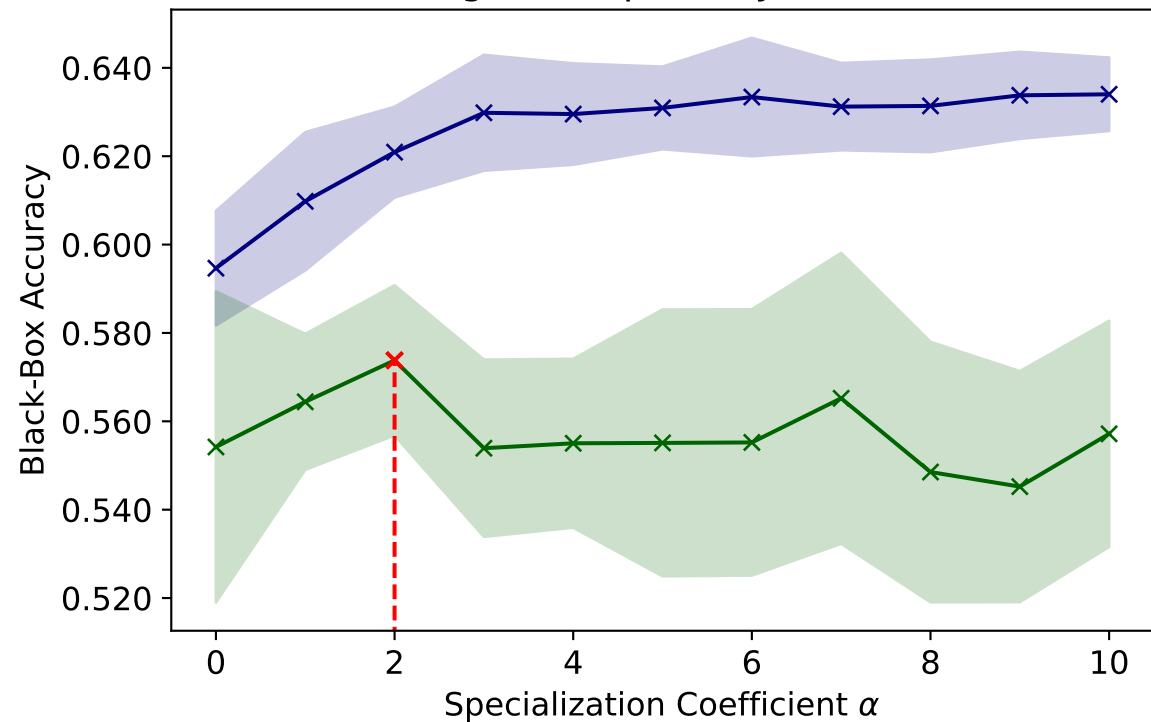

Supplement: supplementary_material [file attachment]

High Transparency (0.85)

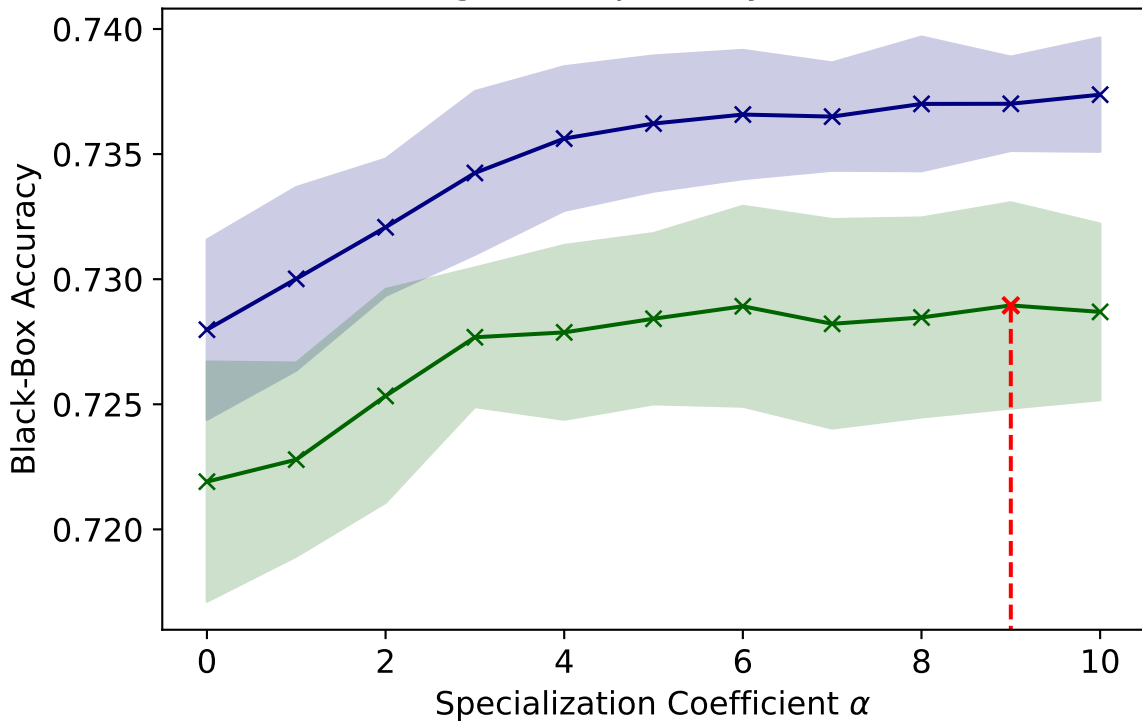

Supplement: supplementary_material [file attachment]

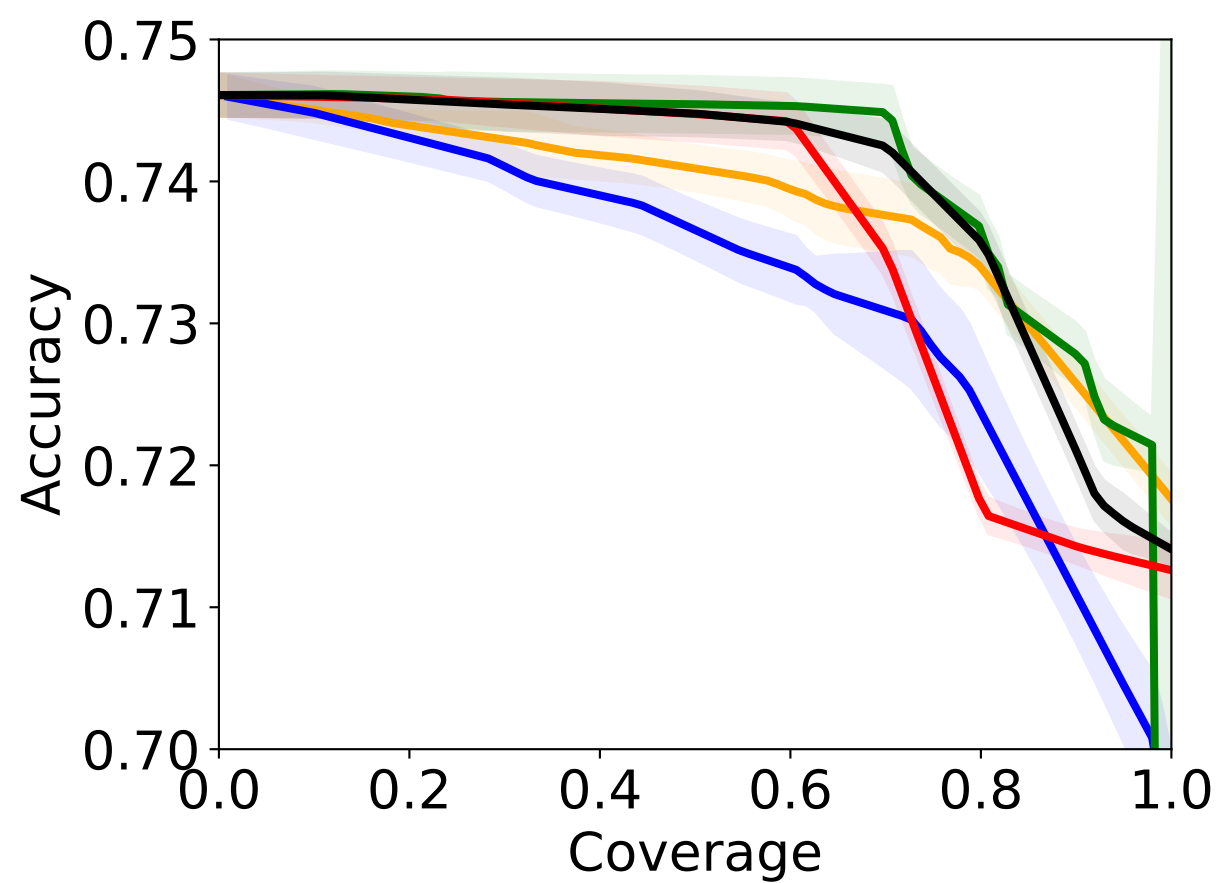

Supplement: supplementary_material [file attachment]

Medium Transparency (0.50)

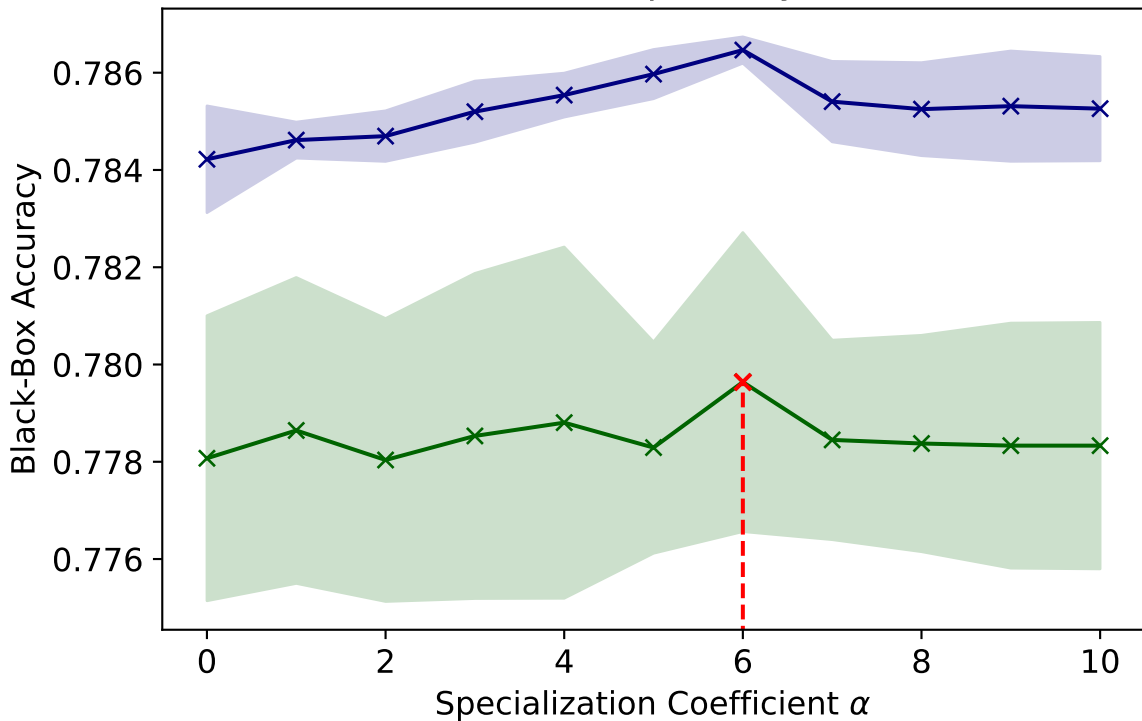

Supplement: supplementary_material [file attachment]

Medium Transparency (0.50)

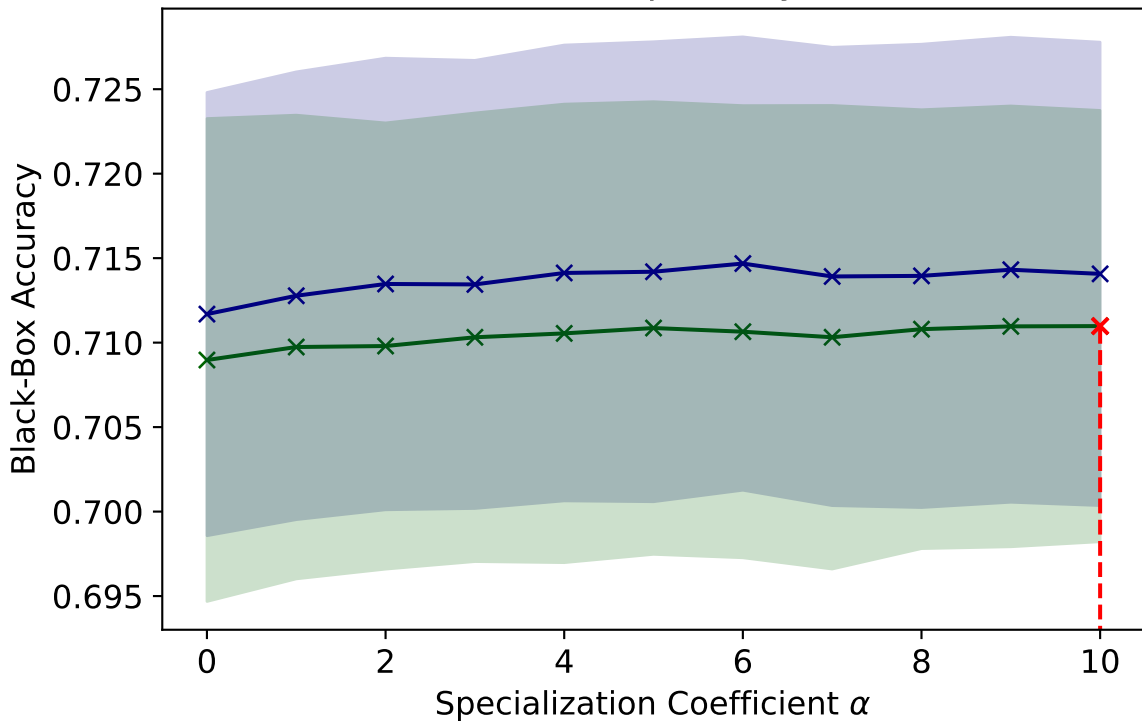

Supplement: supplementary_material [file attachment]

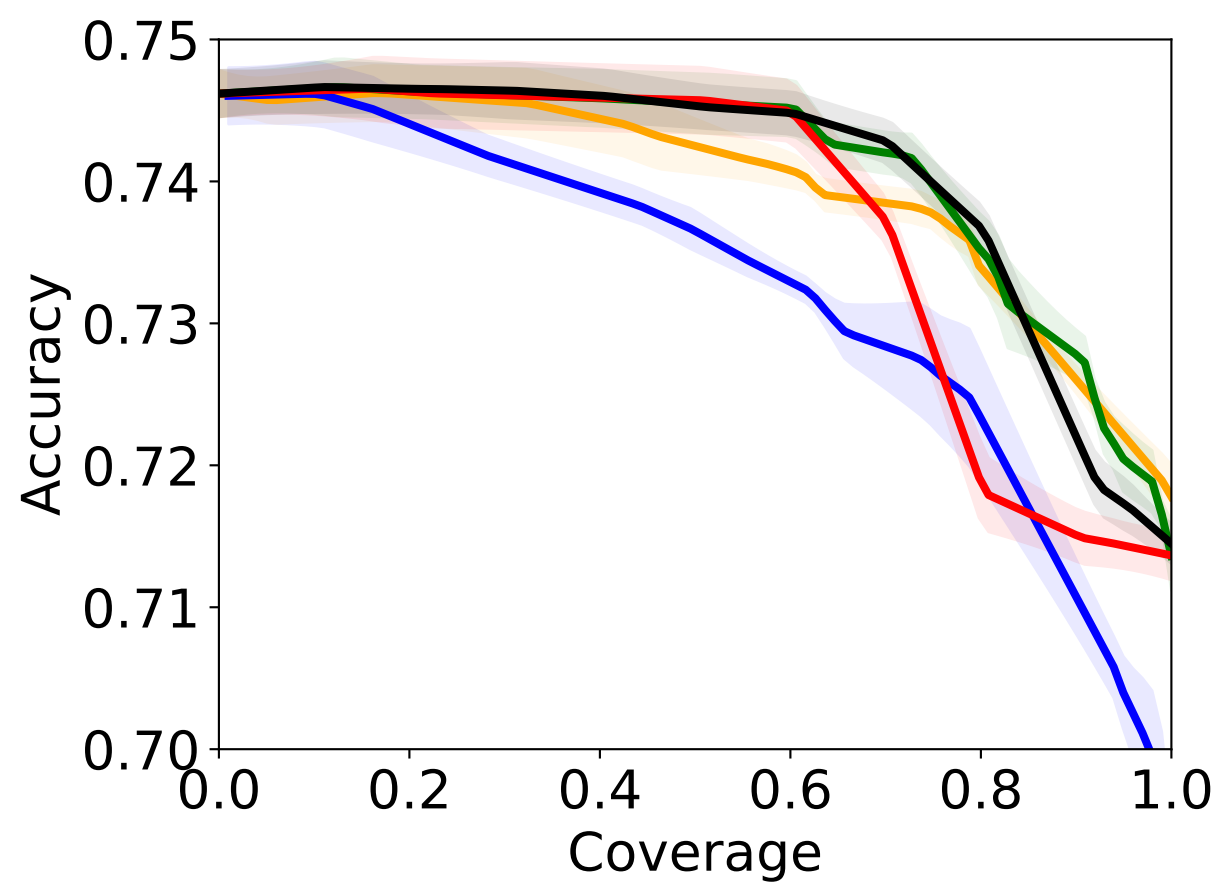

Supplement: supplementary_material [file attachment]

Low Transparency (0.25)

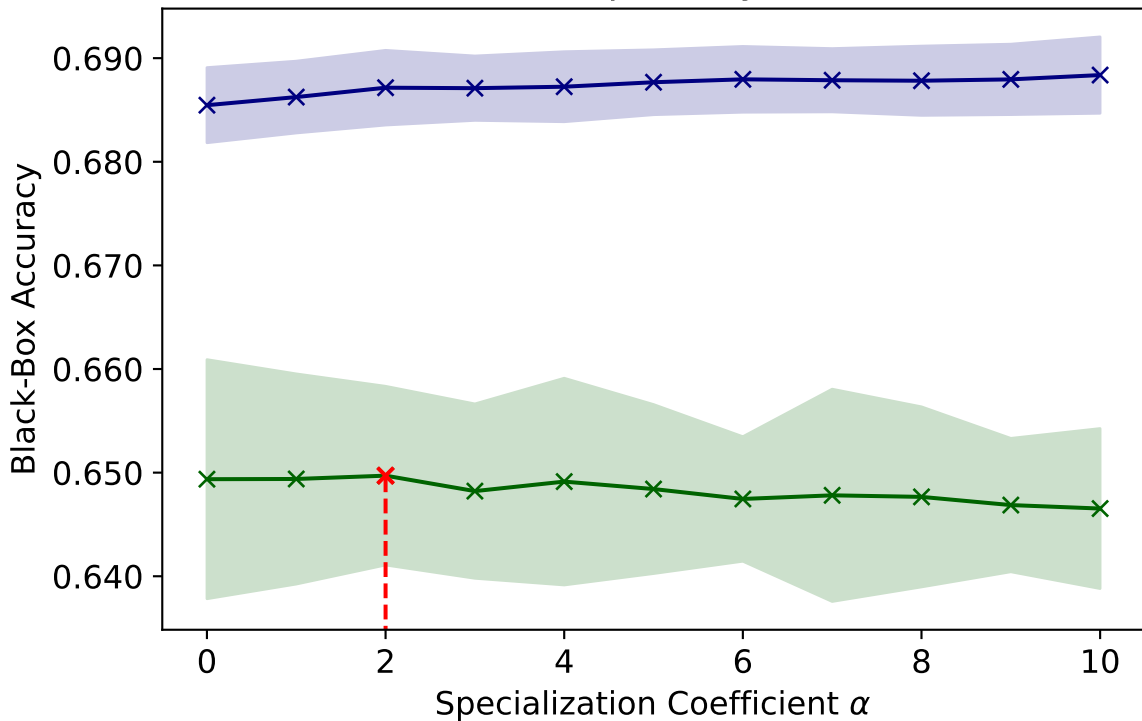

Supplement: supplementary_material [file attachment]

High Transparency (0.75)

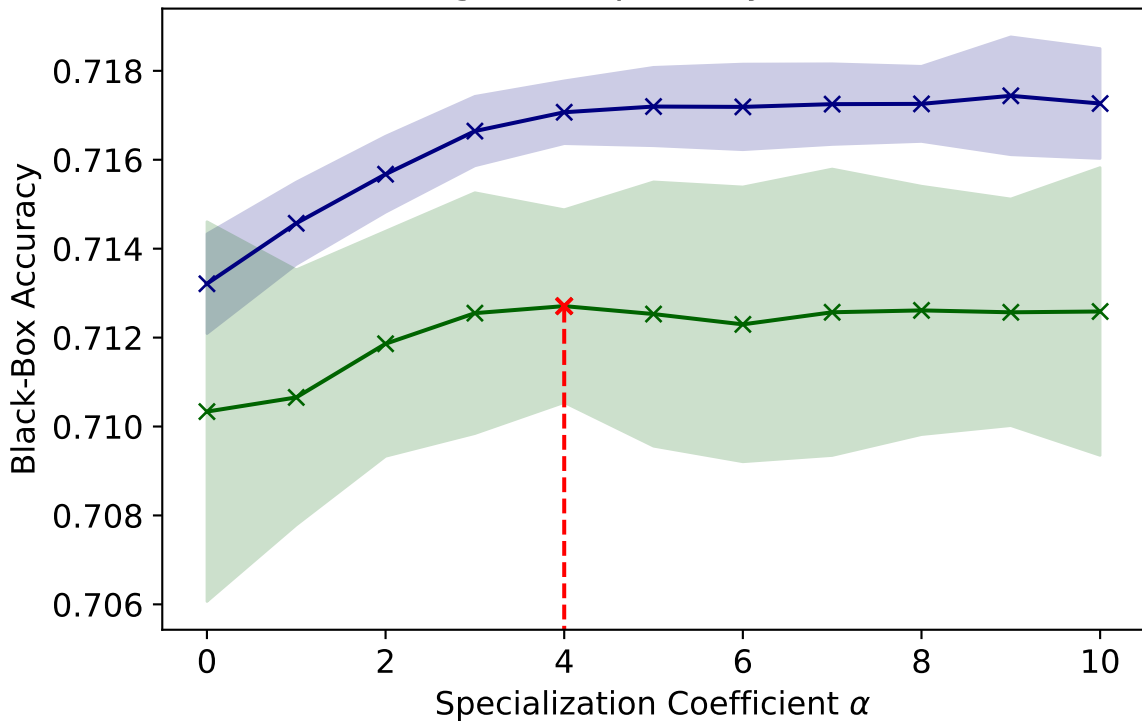

Supplement: supplementary_material [file attachment]

Low Transparency (0.25)

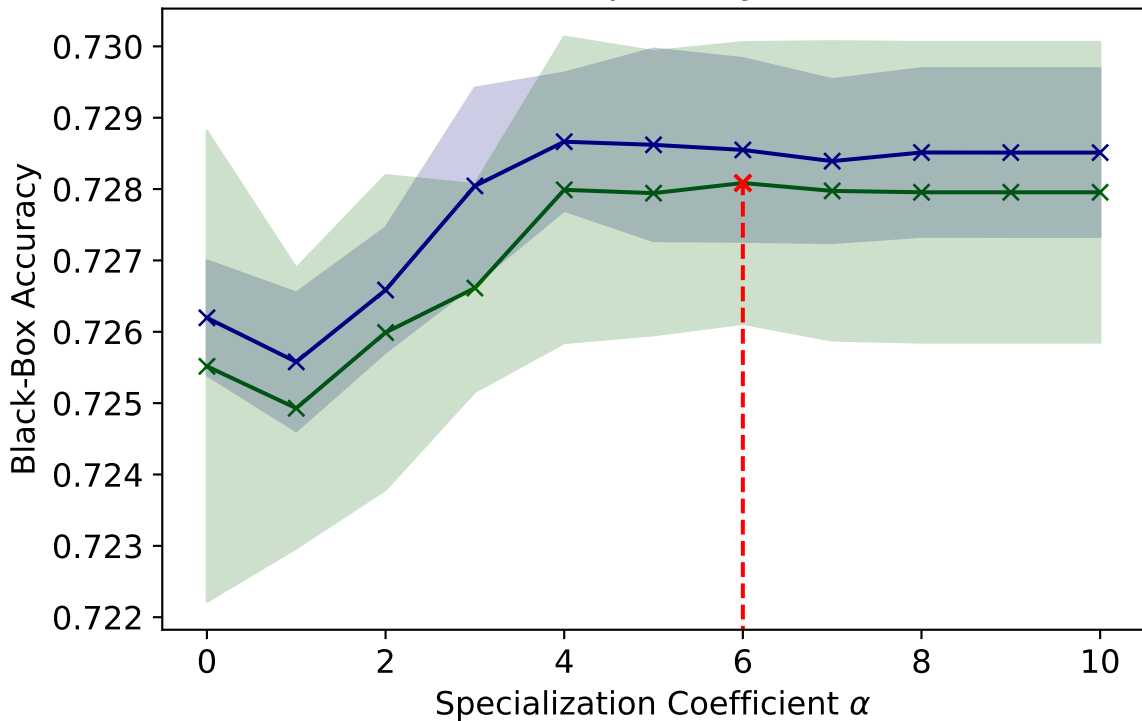

Supplement: supplementary_material [file attachment]

## High Transparency (0.75)

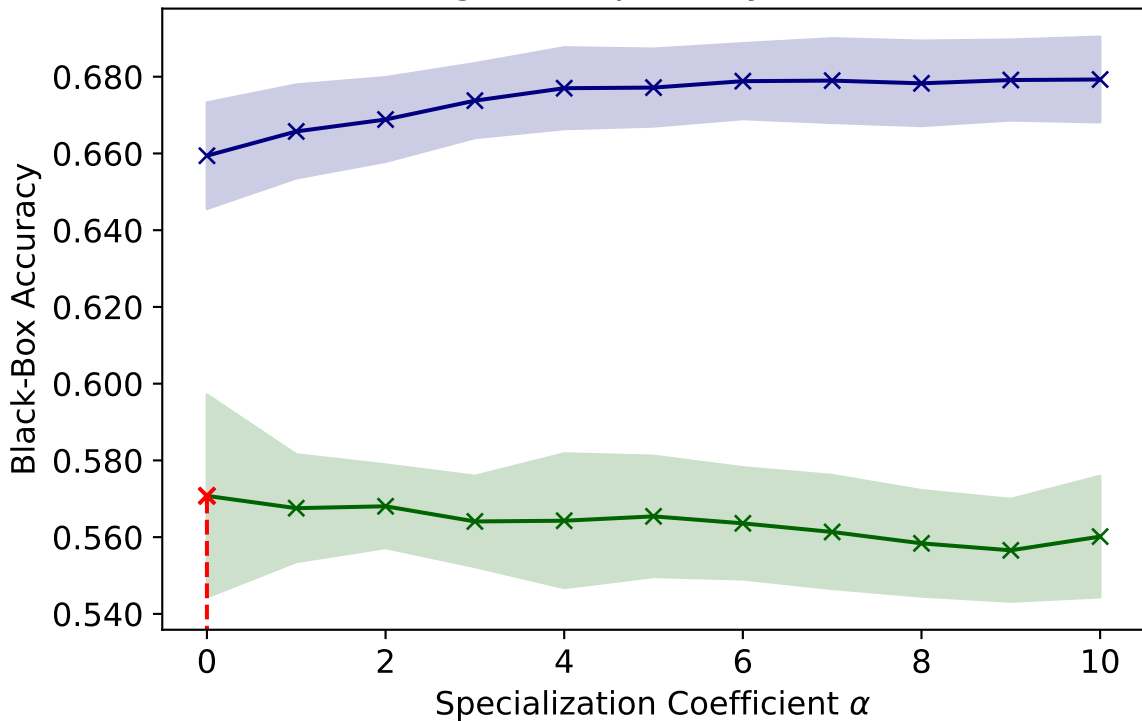

Supplement: supplementary_material [file attachment]

# High Transparency (0.75)

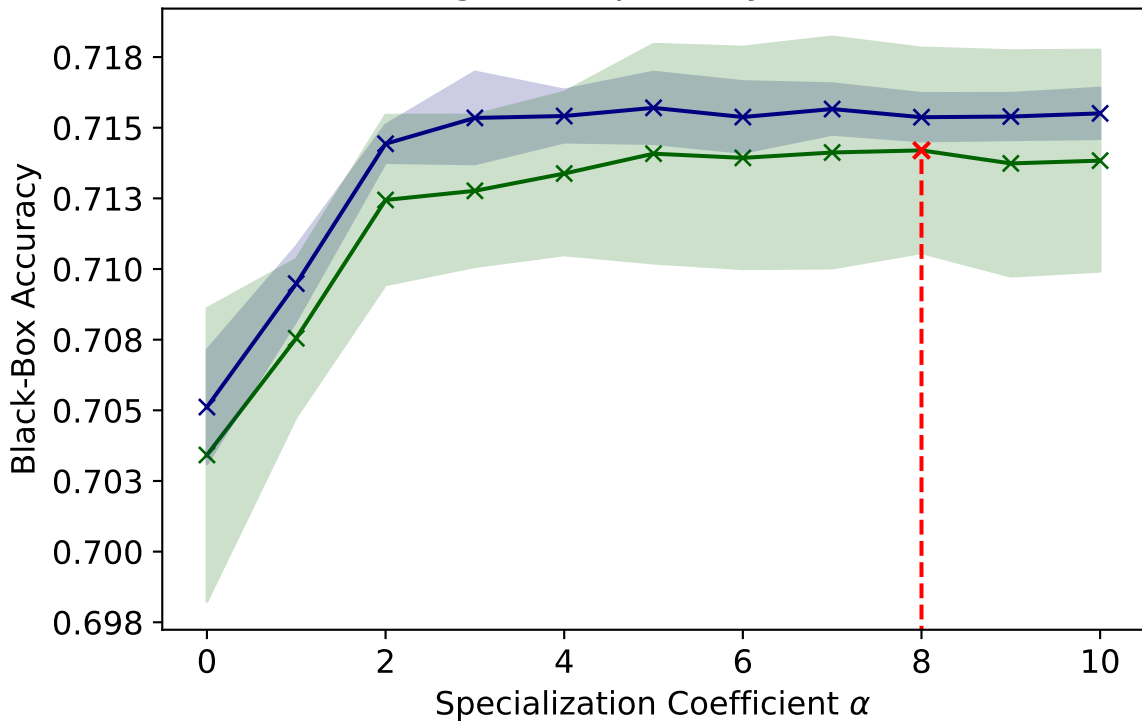

Supplement: supplementary_material [file attachment]

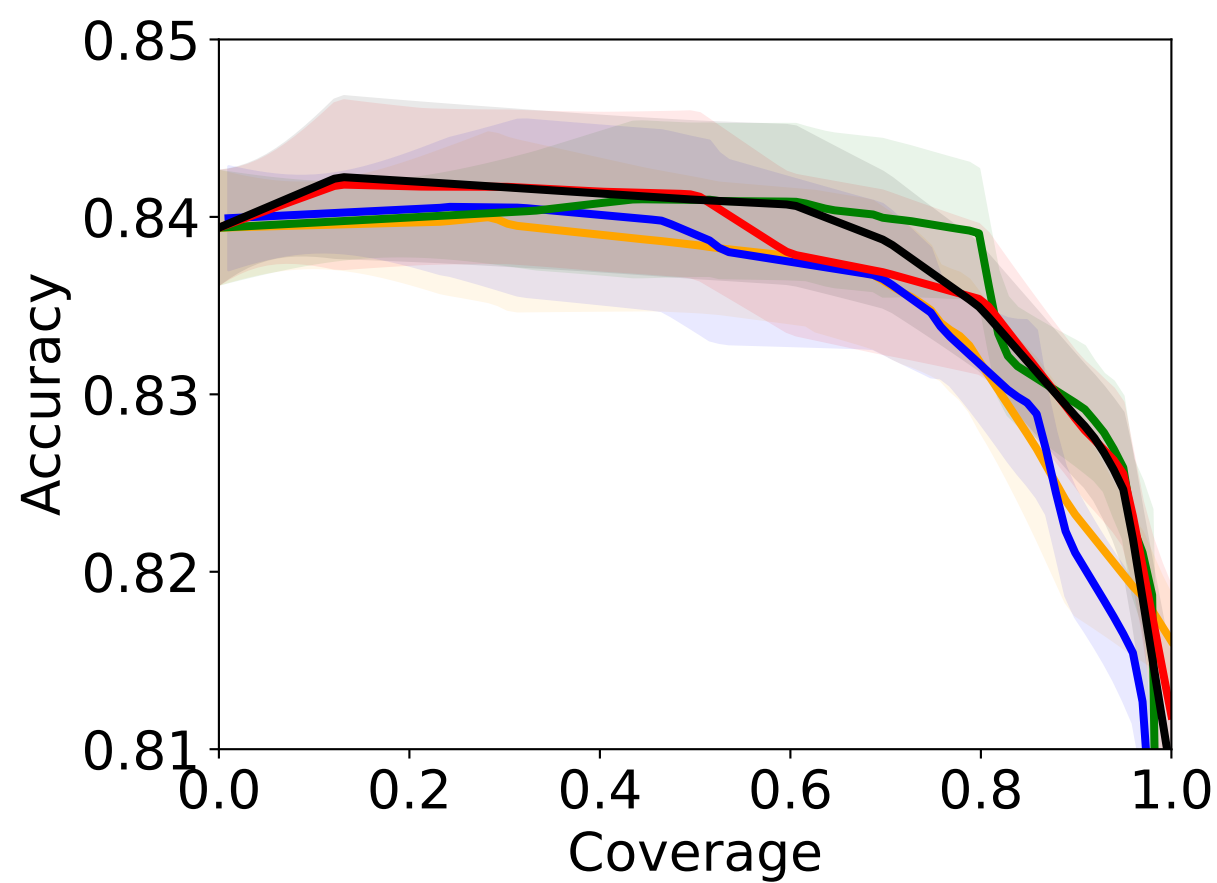

Supplement: supplementary_material [file attachment]
